# Supplementary material
Source: PubMed Central journal article supplement (PMC8489881)
Supplement: mmc1.pdf [file mmc1.pdf]

# THE LANCET

## Supplementary appendix

This appendix formed part of the original submission and has been peer reviewed. We post it as supplied by the authors.

Supplement to: Tartof SY, Slezak JM, Fischer H, et al. Effectiveness of mRNA BNT162b2 COVID-19 vaccine up to 6 months in a large integrated health system in the USA: a retrospective cohort study. *Lancet* 2021; published online Oct 4. [http://dx.doi.org/10.1016/S0140-6736\(21\)02183-8](http://dx.doi.org/10.1016/S0140-6736(21)02183-8).

**Appendix Table 1. Protocol for Testing for SARS-CoV-2, Sequencing, Bioinformatic Processing of Sequencing Output, and Viral Lineage Designation**

|                                                      |                                                                                                                                                                                                                                                                                                                                                                                                                                                                                                                                                                                                                                                                                                                                                                                                                                                                                                                                                                                                                                                                                                                                                                                                                                                                                                    |
|------------------------------------------------------|----------------------------------------------------------------------------------------------------------------------------------------------------------------------------------------------------------------------------------------------------------------------------------------------------------------------------------------------------------------------------------------------------------------------------------------------------------------------------------------------------------------------------------------------------------------------------------------------------------------------------------------------------------------------------------------------------------------------------------------------------------------------------------------------------------------------------------------------------------------------------------------------------------------------------------------------------------------------------------------------------------------------------------------------------------------------------------------------------------------------------------------------------------------------------------------------------------------------------------------------------------------------------------------------------|
| <b>KPSC Testing</b>                                  | Samples were tested at KPSC laboratories with real-time polymerase chain reaction (RT-PCR) using the TaqPath™ COVID-19 High-Throughput Combo Kit on the Thermo Fisher Amplitude Solution (Thermo Fisher Scientific, California, USA) or using the Roche cobas® SARS-CoV-2 assay on the Roche cobas® 8800 System or the Roche cobas® SARS-CoV-2 & Influenza A/B assay on the Roche cobas® Liat® System (Roche Molecular Systems, New Jersey, USA).                                                                                                                                                                                                                                                                                                                                                                                                                                                                                                                                                                                                                                                                                                                                                                                                                                                  |
| <b>Sequencing</b>                                    | RNA was extracted from 400 µl of patient anterior nares sample using the MagMAX Viral/Pathogen kit (ThermoScientific). All samples were subjected to total RNA library preparation using the Rapid RNA Library Kit Instructions (Swift Biosciences). SARS-COV-2 genome capture was accomplished using hybridization kit xGen COVID-19 Capture Panel (Integrated DNA Technologies). Samples were sequenced using the NovaSeq 6000 Sequencing system S1 flow cell, which included the NovaSeq 6000 Sequencing System S1 Reagent Kit v1.5 (300 cycles).                                                                                                                                                                                                                                                                                                                                                                                                                                                                                                                                                                                                                                                                                                                                               |
| <b>Bioinformatic Processing of Sequencing Output</b> | The flow cell output was demultiplexed with bcl2fastq (Illumina) into per-sample FASTQ sequences that were then run through the Helix klados-fastagenerator pipeline to produce a sequence FASTA file. In this pipeline, reads were aligned to a reference comprising the SARS-CoV-2 genome (NCBI accession NC_045512.2) and the human transcriptome (GENCODE v37) using BWA-MEM. For the hybrid capture method, reads were marked for duplicates; for the amplicon method, reads were trimmed for adapters before alignment using Trimmomatic v0.39 <sup>1</sup> and for primer sequences after alignment using iVar v1.3.1 <sup>2</sup> . SARS-CoV-2 variants were called using the Haplotyper algorithm (Sentieon, Inc). The per-base coverage from the alignment (BAM) file and per-variant allele depths from the variant call format (VCF) file were then used to build a consensus sequence according to the following criteria to report each allele: for the hybrid capture method, coverage from at least 5 unique reads is required with at least 80% of the reads supporting the allele; for the amplicon method, coverage from at least 5 reads is required with at least 60% of the reads supporting the allele. Otherwise, that base is considered uncertain, and an N is reported. |
| <b>Viral Lineage Designation</b>                     | Viral sequences were assigned a Pango lineage using pangolearn <sup>32</sup> ( <a href="https://github.com/cov-lineages/pangoLEARN">https://github.com/cov-lineages/pangoLEARN</a> ).                                                                                                                                                                                                                                                                                                                                                                                                                                                                                                                                                                                                                                                                                                                                                                                                                                                                                                                                                                                                                                                                                                              |

<sup>1</sup> Bolger AM, Lohse M, Usadel B. Trimmomatic: a flexible trimmer for Illumina sequence data. *Bioinformatics*. 2014 Aug 1;30(15):2114-20.

<sup>2</sup> Grubaugh, N.D., Gangavarapu, K., Quick, J. et al. An amplicon-based sequencing framework for accurately measuring intrahost virus diversity using PrimalSeq and iVar. *Genome Biol* 20, 8 (2019).

**Appendix Table 2. Select Characteristics of Kaiser Permanente Southern California members age  $\geq 12$  years (n=3 436 957), by BNT162b2 vaccination status<sup>e</sup>, and by SARS-CoV-2 outcomes (Dec 14, 2020 to Aug 8, 2021)**

|                                                           | <b>Unvaccinated*</b><br>(N=2 290 189) | <b>1 dose &lt;14 days***</b><br>(N=27 274) | <b>1 dose <math>\geq 14</math> days or 2 doses &lt;7 days</b><br>(N=76 205) | <b>2 doses <math>\geq 7</math> days</b><br>(N=1 043 289) | <b>Uninfected</b><br>(N=3 252 916) | <b>SARS-CoV-2 infection</b><br>(N=184 041) | <b>COVID-19-hospitalization</b><br>(N=12 130) | <b>Total</b><br>(N=3 436 957) |
|-----------------------------------------------------------|---------------------------------------|--------------------------------------------|-----------------------------------------------------------------------------|----------------------------------------------------------|------------------------------------|--------------------------------------------|-----------------------------------------------|-------------------------------|
| <b># outpatient visits (yr prior)</b>                     |                                       |                                            |                                                                             |                                                          |                                    |                                            |                                               |                               |
| 0                                                         | 586 771 (25.6%)                       | 7066 (25.9%)                               | 19 892 (26.1%)                                                              | 213 531 (20.5%)                                          | 794 014 (24.4%)                    | 33 246 (18.1%)                             | 1302 (10.7%)                                  | 827 260 (24.1%)               |
| 1                                                         | 357 531 (15.6%)                       | 5436 (19.9%)                               | 13 911 (18.3%)                                                              | 163 405 (15.7%)                                          | 512 653 (15.8%)                    | 27 630 (15%)                               | 1002 (8.3%)                                   | 540 283 (15.7%)               |
| 2-4                                                       | 642 537 (28.1%)                       | 8341 (30.6%)                               | 22 994 (30.2%)                                                              | 313 524 (30.1%)                                          | 931 387 (28.6%)                    | 56 009 (30.4%)                             | 2911 (24%)                                    | 987 396 (28.7%)               |
| 5-9                                                       | 412 785 (18%)                         | 4097 (15%)                                 | 12 217 (16%)                                                                | 206 572 (19.8%)                                          | 597 165 (18.4%)                    | 38 506 (20.9%)                             | 3064 (25.3%)                                  | 635 671 (18.5%)               |
| 10+                                                       | 290 565 (12.7%)                       | 2334 (8.6%)                                | 7191 (9.4%)                                                                 | 146 257 (14%)                                            | 417 697 (12.8%)                    | 28 650 (15.6%)                             | 3851 (31.7%)                                  | 446 347 (13%)                 |
| <b># virtual visits (yr prior)</b>                        |                                       |                                            |                                                                             |                                                          |                                    |                                            |                                               |                               |
| 0                                                         | 543 099 (23.7%)                       | 7037 (25.8%)                               | 19 307 (25.3%)                                                              | 220 491 (21.1%)                                          | 758 032 (23.3%)                    | 31 902 (17.3%)                             | 956 (7.9%)                                    | 789 934 (23%)                 |
| 1                                                         | 294 124 (12.8%)                       | 4106 (15.1%)                               | 10 964 (14.4%)                                                              | 135 574 (13%)                                            | 422 309 (13%)                      | 22 459 (12.2%)                             | 713 (5.9%)                                    | 444 768 (12.9%)               |
| 2-4                                                       | 550 456 (24%)                         | 7202 (26.4%)                               | 19 027 (25%)                                                                | 259 094 (24.8%)                                          | 789 625 (24.3%)                    | 46 154 (25.1%)                             | 2013 (16.6%)                                  | 835 779 (24.3%)               |
| 5+                                                        | 902 510 (39.4%)                       | 8929 (32.7%)                               | 26 907 (35.3%)                                                              | 428 130 (41%)                                            | 1 282 950 (39.4%)                  | 83 526 (45.4%)                             | 8448 (69.6%)                                  | 1 366 476 (39.8%)             |
| <b># emergency department visits (yr prior)</b>           |                                       |                                            |                                                                             |                                                          |                                    |                                            |                                               |                               |
| 0                                                         | 1 981 271 (86.5%)                     | 23 852 (87.5%)                             | 66 394 (87.1%)                                                              | 912 269 (87.4%)                                          | 2 829 528 (87%)                    | 154 258 (83.8%)                            | 8553 (70.5%)                                  | 2 983 786 (86.8%)             |
| 1                                                         | 225 072 (9.8%)                        | 2579 (9.5%)                                | 7211 (9.5%)                                                                 | 97 474 (9.3%)                                            | 311 198 (9.6%)                     | 21 138 (11.5%)                             | 2027 (16.7%)                                  | 332 336 (9.7%)                |
| 2+                                                        | 83 846 (3.7%)                         | 843 (3.1%)                                 | 2600 (3.4%)                                                                 | 33 546 (3.2%)                                            | 112 190 (3.4%)                     | 8645 (4.7%)                                | 1550 (12.8%)                                  | 120 835 (3.5%)                |
| <b># inpatient visits (yr prior)*</b>                     |                                       |                                            |                                                                             |                                                          |                                    |                                            |                                               |                               |
| 0                                                         | 2 117 514 (92.5%)                     | 25 485 (93.4%)                             | 70 868 (93%)                                                                | 958 758 (91.9%)                                          | 3 007 004 (92.4%)                  | 165 621 (90%)                              | 9453 (77.9%)                                  | 3 172 625 (92.3%)             |
| 1                                                         | 123 689 (5.4%)                        | 1315 (4.8%)                                | 3881 (5.1%)                                                                 | 58 704 (5.6%)                                            | 175 124 (5.4%)                     | 12 465 (6.8%)                              | 1456 (12%)                                    | 187 589 (5.5%)                |
| 2+                                                        | 48 986 (2.1%)                         | 474 (1.7%)                                 | 1456 (1.9%)                                                                 | 25 827 (2.5%)                                            | 70 788 (2.2%)                      | 5955 (3.2%)                                | 1221 (10.1%)                                  | 76 743 (2.2%)                 |
| <b>Influenza vaccination in year prior to index</b>       | 1 043 991 (45.6%)                     | 10 158 (37.2%)                             | 35 529 (46.6%)                                                              | 648 593 (62.2%)                                          | 1 644 731 (50.6%)                  | 93 540 (50.8%)                             | 8058 (66.4%)                                  | 1 738 271 (50.6%)             |
| <b>Pneumococcal vaccination in 5 years prior to index</b> | 396 893 (17.3%)                       | 1995 (7.3%)                                | 9907 (13%)                                                                  | 200 398 (19.2%)                                          | 578 884 (17.8%)                    | 30 309 (16.5%)                             | 4405 (36.3%)                                  | 609 193 (17.7%)               |
| <b>NDI**</b>                                              |                                       |                                            |                                                                             |                                                          |                                    |                                            |                                               |                               |
| Median                                                    | 0-1                                   | 0-3                                        | 0-1                                                                         | -0-1                                                     | 0                                  | 0-2                                        | 0-3                                           | 0                             |
| Q1, Q3                                                    | -0-5, 0-7                             | -0-3, 1-0                                  | -0-5, 0-8                                                                   | -0-6, 0-6                                                | -0-5, 0-7                          | -0-3, 0-9                                  | -0-3, 0-9                                     | -0-5, 0-7                     |
| <b>Prior negative SARS-CoV-2 PCR</b>                      |                                       |                                            |                                                                             |                                                          |                                    |                                            |                                               |                               |
| 1                                                         | 279 424 (12.2%)                       | 2945 (10.8%)                               | 8772 (11.5%)                                                                | 136 487 (13.1%)                                          | 394 956 (12.1%)                    | 32 672 (17.8%)                             | 2116 (17.4%)                                  | 427 628 (12.4%)               |
| 2+                                                        | 75 064 (3.3%)                         | 719 (2.6%)                                 | 2240 (2.9%)                                                                 | 37 977 (3.6%)                                            | 105 894 (3.3%)                     | 10 106 (5.5%)                              | 1205 (9.9%)                                   | 116 000 (3.4%)                |
| <b>Prior negative SARS-CoV-2 serology</b>                 |                                       |                                            |                                                                             |                                                          |                                    |                                            |                                               |                               |
| 1                                                         | 23 565 (1%)                           | 179 (0.7%)                                 | 645 (0.8%)                                                                  | 14 367 (1.4%)                                            | 36 446 (1.1%)                      | 2310 (1.3%)                                | 104 (0.9%)                                    | 38 756 (1.1%)                 |
| 2+                                                        | 311 (0%)                              | 1 (0%)                                     | 12 (0%)                                                                     | 204 (0%)                                                 | 502 (0%)                           | 26 (0%)                                    | 3 (0%)                                        | 528 (0%)                      |

€ Vaccination status at the earliest of time points among COVID-19 infection, receipt of a different COVID-19 vaccine, disenrollment, death, or end of follow-up (August 8, 2021)

\*Unvaccinated group includes those not vaccinated with BNT162b2 as of August 8<sup>th</sup>, and those vaccinated with COVID-19 vaccines. Those vaccinated with COVID-19 vaccines other than BNT162b2 are censored in the VE modeling at vaccination date.

\*\*NDI=Neighborhood Deprivation Index; yr=year

**Appendix Table 3· Characteristics of Kaiser Permanente Southern California members who were SARS-CoV-2 infected between January 7<sup>th</sup>, 2021 and July 21<sup>st</sup>, 2021 with a PCR-positive specimen (n=8,911) by variant type**

|                                                      | Delta (N=1,422) | Other variant (N=3,586) | Sequencing failed (N=3,903) |
|------------------------------------------------------|-----------------|-------------------------|-----------------------------|
| <b>Age at encounter</b>                              |                 |                         |                             |
| 12-15                                                | 78 (5.5%)       | 223 (6.2%)              | 230 (5.9%)                  |
| 16-44                                                | 860 (60.5%)     | 1925 (53.7%)            | 2045 (52.4%)                |
| 45-64                                                | 384 (27%)       | 1183 (33%)              | 1156 (29.6%)                |
| 65+                                                  | 100 (7%)        | 255 (7.1%)              | 472 (12.1%)                 |
| <b>Sex</b>                                           |                 |                         |                             |
| Male                                                 | 633 (44.5%)     | 1642 (45.8%)            | 1750 (44.8%)                |
| Female                                               | 789 (55.5%)     | 1943 (54.2%)            | 2153 (55.2%)                |
| Other/unknown                                        | 0 (0%)          | 1 (0%)                  | 0 (0%)                      |
| <b>Race/ethnicity</b>                                |                 |                         |                             |
| Hispanic                                             | 564 (39.7%)     | 1678 (46.8%)            | 1888 (48.4%)                |
| Black                                                | 253 (17.8%)     | 380 (10.6%)             | 508 (13%)                   |
| White                                                | 427 (30%)       | 1144 (31.9%)            | 1035 (26.5%)                |
| Asian/PI                                             | 99 (7%)         | 185 (5.2%)              | 258 (6.6%)                  |
| Other                                                | 38 (2.7%)       | 73 (2%)                 | 99 (2.5%)                   |
| Unknown                                              | 41 (2.9%)       | 126 (3.5%)              | 115 (2.9%)                  |
| <b>BMI</b>                                           |                 |                         |                             |
| Underweight (<18.5)                                  | 25 (1.8%)       | 84 (2.3%)               | 114 (2.9%)                  |
| Normal or healthy weight (18.5-24.9)                 | 386 (27.1%)     | 876 (24.4%)             | 978 (25.1%)                 |
| Overweight (25.0-29.9)                               | 428 (30.1%)     | 1030 (28.7%)            | 1137 (29.1%)                |
| Obese, class 1 (30.0-34.9)                           | 299 (21%)       | 782 (21.8%)             | 823 (21.1%)                 |
| Obese, class 2 (35.0-39.9)                           | 151 (10.6%)     | 425 (11.9%)             | 410 (10.5%)                 |
| Obese, class 3 (≥40.0)                               | 99 (7%)         | 285 (7.9%)              | 339 (8.7%)                  |
| Unknown                                              | 34 (2.4%)       | 104 (2.9%)              | 102 (2.6%)                  |
| <b>Comorbidities</b>                                 |                 |                         |                             |
| Congestive heart failure                             | 11 (0.8%)       | 40 (1.1%)               | 110 (2.8%)                  |
| Coronary artery disease                              | 11 (0.8%)       | 21 (0.6%)               | 53 (1.4%)                   |
| Peripheral vascular disease                          | 52 (3.7%)       | 129 (3.6%)              | 262 (6.7%)                  |
| Cerebrovascular disease                              | 14 (1%)         | 29 (0.8%)               | 58 (1.5%)                   |
| Organ transplant                                     | 2 (0.1%)        | 5 (0.1%)                | 19 (0.5%)                   |
| Diabetes with unknown A1c                            | 6 (0.4%)        | 40 (1.1%)               | 44 (1.1%)                   |
| Diabetes with A1c<7.5                                | 52 (3.7%)       | 182 (5.1%)              | 277 (7.1%)                  |
| Diabetes with A1c≥7.5                                | 45 (3.2%)       | 136 (3.8%)              | 186 (4.8%)                  |
| COPD                                                 | 160 (11.3%)     | 331 (9.2%)              | 476 (12.2%)                 |
| Renal disease                                        | 33 (2.3%)       | 85 (2.4%)               | 212 (5.4%)                  |
| Malignancy                                           | 23 (1.6%)       | 62 (1.7%)               | 101 (2.6%)                  |
| Hypertension                                         | 178 (12.5%)     | 537 (15%)               | 747 (19.1%)                 |
| <b>Charlson Index</b>                                |                 |                         |                             |
| 0                                                    | 1105 (77.7%)    | 2748 (76.6%)            | 2790 (71.5%)                |
| 1                                                    | 195 (13.7%)     | 501 (14%)               | 577 (14.8%)                 |
| 2                                                    | 64 (4.5%)       | 177 (4.9%)              | 203 (5.2%)                  |
| 3                                                    | 23 (1.6%)       | 52 (1.5%)               | 86 (2.2%)                   |
| 4+                                                   | 35 (2.5%)       | 108 (3%)                | 247 (6.3%)                  |
| <b>Number of outpatient visits yr prior to index</b> |                 |                         |                             |
| 0                                                    | 240 (16.9%)     | 646 (18%)               | 691 (17.7%)                 |
| 1                                                    | 206 (14.5%)     | 569 (15.9%)             | 573 (14.7%)                 |
| 2-4                                                  | 484 (34%)       | 1117 (31.1%)            | 1140 (29.2%)                |

|                                                                |              |              |              |
|----------------------------------------------------------------|--------------|--------------|--------------|
| 5-9                                                            | 293 (20.6%)  | 723 (20.2%)  | 853 (21.9%)  |
| 10+                                                            | 199 (14%)    | 531 (14.8%)  | 646 (16.6%)  |
| <b>Number of virtual visits yr prior to index</b>              |              |              |              |
| 0                                                              | 258 (18.1%)  | 612 (17.1%)  | 670 (17.2%)  |
| 1                                                              | 182 (12.8%)  | 481 (13.4%)  | 430 (11%)    |
| 2-4                                                            | 371 (26.1%)  | 891 (24.8%)  | 941 (24.1%)  |
| 5+                                                             | 611 (43%)    | 1602 (44.7%) | 1862 (47.7%) |
| <b>Number of emergency department visits yr prior to index</b> |              |              |              |
| 0                                                              | 1205 (84.7%) | 3060 (85.3%) | 3179 (81.5%) |
| 1                                                              | 162 (11.4%)  | 395 (11%)    | 493 (12.6%)  |
| 2+                                                             | 55 (3.9%)    | 131 (3.7%)   | 231 (5.9%)   |
| <b>Number of inpatient visits yr prior to index</b>            |              |              |              |
| 0                                                              | 1319 (92.8%) | 3317 (92.5%) | 3466 (88.8%) |
| 1                                                              | 75 (5.3%)    | 177 (4.9%)   | 308 (7.9%)   |
| 2+                                                             | 28 (2%)      | 92 (2.6%)    | 129 (3.3%)   |
| <b>Influenza vaccination yr prior to index</b>                 | 545 (38.3%)  | 1482 (41.3%) | 1729 (44.3%) |
| <b>Pneumococcal vaccination in 5 yrs prior to index</b>        | 148 (10.4%)  | 430 (12%)    | 596 (15.3%)  |
| <b>Neighborhood Deprivation Index</b>                          |              |              |              |
| Median                                                         | 0            | 0.1          | 0.2          |
| Q1, Q3                                                         | -0.5, 0.8    | -0.5, 0.7    | -0.4, 0.9    |
| <b>Negative SARS-CoV2 PCR prior to 12/14/20</b>                |              |              |              |
| 1                                                              | 255 (17.9%)  | 631 (17.6%)  | 696 (17.8%)  |
| 2+                                                             | 73 (5.1%)    | 185 (5.2%)   | 248 (6.4%)   |
| <b>Positive SARS-CoV2 PCR prior to 12/14/20</b>                |              |              |              |
| 1                                                              | 2 (0.1%)     | 5 (0.1%)     | 28 (0.7%)    |
| 2+                                                             | 0 (0%)       | 1 (0%)       | 7 (0.2%)     |
| <b>Negative SARS-CoV2 serology prior to 12/14/20</b>           |              |              |              |
| 1                                                              | 19 (1.3%)    | 51 (1.4%)    | 56 (1.4%)    |
| 2+                                                             | 1 (0.1%)     | 1 (0%)       | 1 (0%)       |
| <b>Positive SARS-CoV2 serology prior to 12/14/20</b>           |              |              |              |
| 1                                                              | 0 (0%)       | 0 (0%)       | 1 (0%)       |

**Appendix Table 4. Pass and Fail Status for Specimens Submitted for Sequencing, by Cycle Threshold Values and Vaccination Status**

|                           |                    | QC status |       |       |       | All   |
|---------------------------|--------------------|-----------|-------|-------|-------|-------|
|                           |                    | Pass      |       | Fail  |       |       |
|                           |                    | N         | %     | N     | %     | N     |
| <b>Ct for N gene</b>      | <b>Any vaccine</b> |           |       |       |       |       |
| <b>&lt;=27</b>            | <b>Yes</b>         | 716       | 14.3  | 44    | 1.13  | 760   |
|                           | <b>No</b>          | 3,531     | 70.51 | 192   | 4.92  | 3,723 |
| <b>&gt;27</b>             | <b>Yes</b>         | 116       | 2.32  | 349   | 8.94  | 465   |
|                           | <b>No</b>          | 466       | 9.31  | 1,452 | 37.2  | 1,918 |
| <b>Missing</b>            | <b>Yes</b>         | 43        | 0.86  | 688   | 17.63 | 731   |
|                           | <b>No</b>          | 136       | 2.72  | 1,178 | 30.18 | 1,314 |
| <b>Ct for ORF1ab gene</b> | <b>Any vaccine</b> |           |       |       |       |       |
| <b>&lt;=27</b>            | <b>Yes</b>         | 717       | 14.32 | 38    | 0.97  | 755   |
|                           | <b>No</b>          | 3,501     | 69.91 | 161   | 4.13  | 3,662 |
| <b>&gt;27</b>             | <b>Yes</b>         | 115       | 2.3   | 486   | 12.45 | 601   |
|                           | <b>No</b>          | 496       | 9.9   | 1,805 | 46.25 | 2,301 |
| <b>Missing</b>            | <b>Yes</b>         | 43        | 0.86  | 557   | 14.27 | 600   |
|                           | <b>No</b>          | 136       | 2.72  | 856   | 21.93 | 992   |
| <b>Ct for S gene</b>      | <b>Any vaccine</b> |           |       |       |       |       |
| <b>&lt;=27</b>            | <b>Yes</b>         | 549       | 10.96 | 33    | 0.85  | 582   |
|                           | <b>No</b>          | 2,256     | 45.05 | 127   | 3.25  | 2,383 |
| <b>&gt;27</b>             | <b>Yes</b>         | 69        | 1.38  | 137   | 3.51  | 206   |
|                           | <b>No</b>          | 304       | 6.07  | 537   | 13.76 | 841   |
| <b>Missing</b>            | <b>Yes</b>         | 257       | 5.13  | 911   | 23.34 | 1,168 |
|                           | <b>No</b>          | 1,573     | 31.41 | 2,158 | 55.29 | 3,731 |
| <b>All</b>                |                    | 5,008     | 100   | 3,903 | 100   | 8,911 |

\*Ct=cycle threshold, QC=quality control; any vaccine = mRNA-1273, Ad26.COV2.S, BNT162b2, and other vaccines

**Appendix Table 5.**

**a.) Unadjusted and adjusted\* vaccine effectiveness, with 95% confidence intervals, against SARS-CoV-2 infection, by age group and vaccination status with BNT162b2, Kaiser Permanente Southern California, December 14th 2020 – August 8th, 2021**

|                 | Unvaccinated        |              | Partially vaccinated (1 dose + 14 days, no 2nd dose) |              |                                     |                                 | 2nd dose, partially vaccinated (<7 days after 2nd dose) |              |                                     |                                 | Fully vaccinated (2nd dose + 7 days) |              |                                     |                                 |
|-----------------|---------------------|--------------|------------------------------------------------------|--------------|-------------------------------------|---------------------------------|---------------------------------------------------------|--------------|-------------------------------------|---------------------------------|--------------------------------------|--------------|-------------------------------------|---------------------------------|
|                 | <i>Person-years</i> | <i>Cases</i> | <i>Person-years</i>                                  | <i>Cases</i> | <i>VE<sub>unadj</sub>** (95%CI)</i> | <i>VE<sub>adj</sub> (95%CI)</i> | <i>Person-years</i>                                     | <i>Cases</i> | <i>VE<sub>unadj</sub>** (95%CI)</i> | <i>VE<sub>adj</sub> (95%CI)</i> | <i>Person-years</i>                  | <i>Cases</i> | <i>VE<sub>unadj</sub>** (95%CI)</i> | <i>VE<sub>adj</sub> (95%CI)</i> |
| Age 12-15 years | 106559              | 8425         | 2186                                                 | 24           | 67 (50- 78)                         | 67 (50- 78)                     | 1453                                                    | 1            | 97 (82-100)                         | 97 (82-100)                     | 9294                                 | 59           | 91 (89- 93)                         | 91 (88- 93)                     |
| Age 16-44 years | 597554              | 82655        | 14798                                                | 266          | 63 (58- 67)                         | 62 (57- 66)                     | 7535                                                    | 48           | 82 (77- 87)                         | 82 (76- 87)                     | 110242                               | 1652         | 73 (71- 74)                         | 73 (71- 74)                     |
| Age 45-64 years | 359505              | 51922        | 10963                                                | 211          | 56 (49- 61)                         | 55 (49- 61)                     | 5697                                                    | 64           | 70 (61- 76)                         | 68 (60- 75)                     | 93501                                | 1109         | 72 (70- 74)                         | 73 (71- 74)                     |
| Age ≥65 years   | 168143              | 17278        | 7549                                                 | 84           | 45 (32- 56)                         | 46 (33- 57)                     | 4265                                                    | 26           | 64 (47- 75)                         | 64 (46- 75)                     | 86806                                | 594          | 58 (54- 62)                         | 61 (57- 65)                     |
| All ≥12 years   | 1231762             | 160280       | 35496                                                | 585          | 58 (55- 62)                         | 58 (54- 61)                     | 18950                                                   | 139          | 76 (72- 80)                         | 75 (71- 79)                     | 299843                               | 3414         | 74 (73- 75)                         | 73 (72- 74)                     |
| All ≥16 years   | 1125203             | 151855       | 33310                                                | 561          | 58 (55- 62)                         | 57 (53- 61)                     | 17496                                                   | 138          | 75 (70- 79)                         | 74 (69- 78)                     | 290548                               | 3355         | 74 (73- 75)                         | 72 (71- 73)                     |

**b.) Unadjusted and adjusted\* vaccine effectiveness, with 95% confidence intervals, against SARS-CoV-2 hospitalization, by age group and vaccination status with BNT162b2, Kaiser Permanente Southern California, December 14th 2020 – August 8th, 2021**

|                 | Unvaccinated        |              | Partially vaccinated (1 dose + 14 days, no 2nd dose) |              |                                     |                                 | 2nd dose, partially vaccinated (<7 days after 2nd dose) |              |                                     |                                 | Fully vaccinated (2nd dose + 7 days) |              |                                     |                                 |
|-----------------|---------------------|--------------|------------------------------------------------------|--------------|-------------------------------------|---------------------------------|---------------------------------------------------------|--------------|-------------------------------------|---------------------------------|--------------------------------------|--------------|-------------------------------------|---------------------------------|
|                 | <i>Person-years</i> | <i>Cases</i> | <i>Person-years</i>                                  | <i>Cases</i> | <i>VE<sub>unadj</sub>** (95%CI)</i> | <i>VE<sub>adj</sub> (95%CI)</i> | <i>Person-years</i>                                     | <i>Cases</i> | <i>VE<sub>unadj</sub>** (95%CI)</i> | <i>VE<sub>adj</sub> (95%CI)</i> | <i>Person-years</i>                  | <i>Cases</i> | <i>VE<sub>unadj</sub>** (95%CI)</i> | <i>VE<sub>adj</sub> (95%CI)</i> |
| Age 12-15 years | 110187              | 44           | 2268                                                 | 0            | 100 (100- 100)                      | 100 (100- 100)                  | 1506                                                    | 0            | 100 (100- 100)                      | 100 (100- 100)                  | 9613                                 | 1            | 83 (-35- 98)                        | 81 (-55-98)                     |
| Age 16-44 years | 626720              | 2239         | 15559                                                | 10           | 72 (48- 85)                         | 74 (52- 86)                     | 7903                                                    | 1            | 94 (55- 99)                         | 94 (58- 99)                     | 115057                               | 27           | 91 (87- 94)                         | 92 (88- 95)                     |
| Age 45-64 years | 374836              | 4078         | 11481                                                | 12           | 78 (60- 87)                         | 78 (61- 88)                     | 5954                                                    | 4            | 84 (57- 94)                         | 84 (56- 94)                     | 97246                                | 47           | 90 (87- 93)                         | 91 (88- 93)                     |
| Age ≥65 years   | 171279              | 4965         | 7698                                                 | 56           | 21 (-4- 39)                         | 25 (1- 43)                      | 4353                                                    | 9            | 75 (52- 87)                         | 76 (53- 87)                     | 88463                                | 99           | 84 (80- 87)                         | 86 (82- 88)                     |
| All ≥12 years   | 1283022             | 11326        | 37007                                                | 78           | 39 (24- 52)                         | 54 (43- 63)                     | 19716                                                   | 14           | 78 (62- 87)                         | 82 (70- 89)                     | 310378                               | 174          | 84 (81- 86)                         | 90 (89- 92)                     |
| All ≥16 years   | 1172835             | 11282        | 34739                                                | 78           | 42 (27- 53)                         | 54 (42- 63)                     | 18210                                                   | 14           | 78 (63- 87)                         | 82 (69- 89)                     | 300765                               | 173          | 85 (82- 87)                         | 90 (89- 92)                     |

\*VE estimates and 95% confidence intervals calculated via Cox regression models adjusted for: age, sex, race/ethnicity, prior PCR positive SARS-CoV-2, prior healthcare utilization (inpatient, outpatient, emergency department, virtual), BMI, acute myocardial infarction, congestive heart failure, cerebrovascular disease, peripheral vascular disease, organ transplant, diabetes mellitus, malignancy, renal disease, chronic obstructive pulmonary disease, hypertension, Charlson index, influenza vaccination year prior to index date, pneumococcal vaccination 5 years prior to index date, neighborhood deprivation index, and account for calendar time and time-varying vaccination status.

\*\*The unadjusted VE estimates account for calendar time and use time-varying vaccination status. The estimated hazard for a model with time varying covariates does not have the direct relationship with cumulative incidence that the standard Cox model does, as cumulative incidence depends on the entire history of the time-varying covariate for all patients. Thus, the VE estimates from these models will not match a crude rate ratio calculated using events/person-time. Using calendar time as the time scale, the baseline hazard varies over time, accounting for secular differences in infection, testing, and other unmeasured factors that contribute to the event rate, while the vaccination status of each individual is also allowed to vary over time. These factors drive the differences seen between the VE estimated by the Cox model and the crude event rate. In our data we can illustrate this by breaking our follow-up into one-month segments, beginning follow-up at the beginning of the month and censoring follow-up at the end of the month. During each month fewer individuals transition vaccination status and the secular trends have much less impact, and the resulting crude rate ratios are much closer to the VE estimate from the Cox model (Table 5c).

**Table 5c. Monthly Comparison of Crude Rate Ratios to VE Estimated Using the Cox Model With Time-varying Vaccination Status, Age >12 Years**

| Month of Follow-up | Vaccination Status            | People included | Person years | Cases | Cases / 100000py | Crude VE | Model VE |  | People included | Person years | Cases | Cases / 100000py | Crude VE | Model VE |
|--------------------|-------------------------------|-----------------|--------------|-------|------------------|----------|----------|--|-----------------|--------------|-------|------------------|----------|----------|
| December 2020      | Unvaccinated                  | 3436957         | 157175.1     | 68564 | 43622.7          |          |          |  | 676271          | 31216.4      | 7291  | 23356.3          |          |          |
|                    | 1 <sup>st</sup> Dose, Partial | 5591            | 5.32         | 1     | 18788.1          | 57       | 67       |  | 269             | 0.22         | 0     | 0                | 100      | N/A      |
|                    | 2 <sup>nd</sup> Dose, Partial | 30              | 0.23         | 0     | 0                | 100      | N/A      |  | 8               | 0.02         | 0     | 0                | 100      | N/A      |
|                    | Fully Vaccinated              | 7               | 0.01         | 0     | 0                | 100      | N/A      |  | 0               | 0            | 0     | 0                | N/A      | N/A      |
| January 2021       | Unvaccinated                  | 3231179         | 252449.6     | 64556 | 25571.8          |          |          |  | 655115          | 50270.3      | 8036  | 15986            |          |          |
|                    | 1 <sup>st</sup> Dose, Partial | 80243           | 1392.0       | 199   | 14295.7          | 44       | 46       |  | 9021            | 122.3        | 11    | 8996             | 44       | 31       |
|                    | 2 <sup>nd</sup> Dose, Partial | 60347           | 1045.7       | 68    | 6502.9           | 75       | 68       |  | 4317            | 70.3         | 4     | 5687             | 64       | 54       |
|                    | Fully Vaccinated              | 47956           | 1458.4       | 32    | 2194.2           | 91       | 84       |  | 2933            | 82.3         | 3     | 3643             | 77       | 61       |
| February 2021      | Unvaccinated                  | 2841630         | 194541.8     | 9517  | 4892.0           |          |          |  | 495977          | 25932.8      | 1143  | 4407.5           |          |          |
|                    | 1 <sup>st</sup> Dose, Partial | 196527          | 3602.5       | 64    | 1776.5           | 64       | 56       |  | 125717          | 2241.9       | 34    | 1516.6           | 66       | 49       |
|                    | 2 <sup>nd</sup> Dose, Partial | 149385          | 2297         | 19    | 827.2            | 83       | 76       |  | 87393           | 1363.4       | 10    | 733.5            | 83       | 70       |
|                    | Fully Vaccinated              | 155922          | 6458.1       | 52    | 805.2            | 84       | 79       |  | 60229           | 1287.0       | 12    | 932.4            | 79       | 62       |
| March 2021         | Unvaccinated                  | 2438824         | 174938.5     | 2793  | 1596.6           |          |          |  | 254539          | 15851.8      | 195   | 1230.1           |          |          |
|                    | 1 <sup>st</sup> Dose, Partial | 321359          | 6381.2       | 43    | 673.9            | 58       | 55       |  | 114581          | 2327.1       | 20    | 859.4            | 30       | 29       |
|                    | 2 <sup>nd</sup> Dose, Partial | 286784          | 4328.6       | 23    | 531.4            | 67       | 65       |  | 133164          | 2085.9       | 12    | 575.3            | 53       | 54       |
|                    | Fully Vaccinated              | 376391          | 21008.56     | 45    | 214.2            | 87       | 85       |  | 183541          | 10454.2      | 21    | 200.9            | 84       | 82       |
| April 2021         | Unvaccinated                  | 1807694         | 123125.2     | 1894  | 1538.3           |          |          |  | 151155          | 10750.8      | 98    | 911.6            |          |          |
|                    | 1 <sup>st</sup> Dose, Partial | 300218          | 6424.8       | 39    | 607.0            | 61       | 59       |  | 23560           | 764.8        | 3     | 392.3            | 57       | 56       |
|                    | 2 <sup>nd</sup> Dose, Partial | 279347          | 3976.0       | 9     | 226.4            | 85       | 85       |  | 24958           | 338.2        | 0     | 0.0              | 100      | N/A      |
|                    | Fully Vaccinated              | 605447          | 39253.38     | 72    | 183.4            | 88       | 88       |  | 205780          | 15636.0      | 32    | 204.7            | 78       | 77       |
| May 2021           | Unvaccinated                  | 1337876         | 101238.2     | 1000  | 987.8            |          |          |  | 123522          | 9612.1       | 61    | 634.6            |          |          |
|                    | 1 <sup>st</sup> Dose, Partial | 247431          | 6069.8       | 21    | 346.0            | 65       | 67       |  | 15054           | 639.5        | 1     | 156.4            | 75       | 100      |



|             |                               |         |          |      |         |    |    |  |        |         |     |        |     |     |
|-------------|-------------------------------|---------|----------|------|---------|----|----|--|--------|---------|-----|--------|-----|-----|
|             | 2 <sup>nd</sup> Dose, Partial | 218973  | 3574.4   | 4    | 111.9   | 89 | 89 |  | 9816   | 158.7   | 0   | 0.0    | 100 | N/A |
|             | Fully Vaccinated              | 802314  | 58094.44 | 72   | 123.9   | 87 | 87 |  | 213845 | 17201.1 | 15  | 87.2   | 86  | 85  |
| June 2021   | Unvaccinated                  | 1138928 | 86747.51 | 1174 | 1353.4  |    |    |  | 111988 | 8647.9  | 54  | 624.4  |     |     |
|             | 1 <sup>st</sup> Dose, Partial | 164182  | 5089.6   | 18   | 353.7   | 74 | 72 |  | 10543  | 546.8   | 3   | 548.6  | 12  | 9   |
|             | 2 <sup>nd</sup> Dose, Partial | 129513  | 2061.6   | 2    | 97.0    | 93 | 92 |  | 4929   | 71.9    | 0   | 0.0    | 100 | N/A |
|             | Fully Vaccinated              | 912288  | 68029.57 | 180  | 264.6   | 80 | 80 |  | 217348 | 17093.5 | 47  | 275.0  | 56  | 54  |
|             | Unvaccinated                  | 1042964 | 82847.71 | 7175 | 8660.5  |    |    |  | 105705 | 8482.3  | 244 | 2876.6 |     |     |
| July 2021   | 1 <sup>st</sup> Dose, Partial | 100649  | 4323.2   | 139  | 3215.2  | 63 | 63 |  | 8995   | 546.8   | 10  | 1829.0 | 36  | 36  |
|             | 2 <sup>nd</sup> Dose, Partial | 63018   | 936.3    | 10   | 1068.1  | 88 | 87 |  | 2892   | 44.1    | 0   | 0.0    | 100 | N/A |
|             | Fully Vaccinated              | 960257  | 76665.8  | 1946 | 2538.3  | 71 | 71 |  | 218949 | 17860.6 | 287 | 1606.9 | 44  | 44  |
| August 2021 | Unvaccinated                  | 959825  | 18179.9  | 3607 | 19840.6 |    |    |  | 100176 | 1907.5  | 156 | 8178.3 |     |     |
|             | 1 <sup>st</sup> Dose, Partial | 64901   | 1047.1   | 61   | 5825.6  | 71 | 70 |  | 7403   | 131.1   | 2   | 1525.4 | 81  | 80  |
|             | 2 <sup>nd</sup> Dose, Partial | 15235   | 153.9    | 4    | 2599.9  | 87 | 86 |  | 764    | 7.6     | 0   | 0.0    | 100 | N/A |
|             | Fully Vaccinated              | 962774  | 18362.79 | 1015 | 5527.5  | 72 | 72 |  | 218497 | 4182.3  | 177 | 4232.2 | 48  | 46  |

\*Note that the person-time by month does not add to the overall person-time due to truncation at the last day of the month and rounding.

**Appendix Table 6**

**a. Adjusted\* vaccine effectiveness, with 95% confidence intervals, against SARS-CoV-2 infection, by age group and number of months since being fully vaccinated with BNT162b2, Kaiser Permanente Southern California, December 14th 2020 – August 8th, 2021**

| Age   | Unvaccinated |       | Fully vaccinated < 1 month (7-36 days after 2nd dose) |       |                                |                           | Fully vaccinated 1- <2 months (37-66 days after 2nd dose) |       |                                |                           | Fully vaccinated 2- <3 months (67-96 days after 2nd dose) |       |                                |                           |
|-------|--------------|-------|-------------------------------------------------------|-------|--------------------------------|---------------------------|-----------------------------------------------------------|-------|--------------------------------|---------------------------|-----------------------------------------------------------|-------|--------------------------------|---------------------------|
|       | Person-years | Cases | Person-years                                          | Cases | VE <sub>unadj</sub> ** (95%CI) | VE <sub>adj</sub> (95%CI) | Person-years                                              | Cases | VE <sub>unadj</sub> ** (95%CI) | VE <sub>adj</sub> (95%CI) | Person-years                                              | Cases | VE <sub>unadj</sub> ** (95%CI) | VE <sub>adj</sub> (95%CI) |
| 12-15 | 110187       | 44    | 5586                                                  | 23    | 91 (86- 94)                    | 91 (86- 94)               | 3354                                                      | 31    | 92 (88- 94)                    | 92 (88- 94)               | 309                                                       | 4     | 88 (68- 95)                    | 88 (68- 96)               |
| 16-44 | 626720       | 2239  | 31235                                                 | 90    | 89 (87- 91)                    | 89 (87- 91)               | 28944                                                     | 165   | 84 (81- 86)                    | 84 (81- 86)               | 23861                                                     | 355   | 78 (76- 80)                    | 78 (75- 80)               |
| 45-64 | 374836       | 4078  | 23946                                                 | 71    | 88 (84- 90)                    | 87 (84- 90)               | 22945                                                     | 80    | 84 (80- 87)                    | 85 (81- 88)               | 20600                                                     | 201   | 77 (74- 80)                    | 78 (74- 81)               |
| 65+   | 171279       | 4965  | 18145                                                 | 43    | 79 (72- 85)                    | 80 (73- 85)               | 17868                                                     | 34    | 77 (68- 84)                    | 79 (70- 85)               | 17377                                                     | 34    | 73 (61- 81)                    | 75 (65- 83)               |
| 12+   | 1283022      | 11326 | 78912                                                 | 227   | 88 (86- 90)                    | 88 (86- 89)               | 73111                                                     | 310   | 85 (83- 87)                    | 84 (83- 86)               | 62148                                                     | 594   | 77 (75- 79)                    | 78 (76- 79)               |
| 16+   | 1172835      | 11282 | 73326                                                 | 204   | 88 (86- 89)                    | 87 (85- 89)               | 69757                                                     | 279   | 84 (82- 86)                    | 83 (81- 85)               | 61839                                                     | 590   | 78 (76- 80)                    | 77 (76- 79)               |

| Age   | Fully vaccinated 3- <4 months (97-126 days after 2nd dose) |       |                                |                           | Fully vaccinated 4- <5 months (127-156 days after 2nd dose) |       |                                |                           | Fully vaccinated >=5 months (157+ days after 2nd dose) |       |                                |                           |
|-------|------------------------------------------------------------|-------|--------------------------------|---------------------------|-------------------------------------------------------------|-------|--------------------------------|---------------------------|--------------------------------------------------------|-------|--------------------------------|---------------------------|
|       | Person-years                                               | Cases | VE <sub>unadj</sub> ** (95%CI) | VE <sub>adj</sub> (95%CI) | Person-years                                                | Cases | VE <sub>unadj</sub> ** (95%CI) | VE <sub>adj</sub> (95%CI) | Person-years                                           | Cases | VE <sub>unadj</sub> ** (95%CI) | VE <sub>adj</sub> (95%CI) |
| 12-15 | 43                                                         | 1     | 83 (-22- 98)                   | 84 (-14- 98)              | 2                                                           | 0     | 100 (100-100)                  | 100 (100-100)             | 1                                                      | 0     | 100 (99- 100)                  | 100 (100- 100)            |
| 16-44 | 14621                                                      | 429   | 67 (64- 70)                    | 68 (65- 71)               | 6769                                                        | 265   | 55 (49- 60)                    | 57 (51- 62)               | 4811                                                   | 348   | 40 (33- 46)                    | 39 (32- 45)               |
| 45-64 | 14373                                                      | 344   | 65 (61- 69)                    | 67 (63- 70)               | 6918                                                        | 197   | 59 (53- 65)                    | 61 (55- 66)               | 4718                                                   | 216   | 52 (45- 58)                    | 50 (43- 57)               |
| 65+   | 16485                                                      | 101   | 51 (39- 60)                    | 56 (45- 65)               | 13120                                                       | 255   | 44 (35- 52)                    | 49 (41- 57)               | 3810                                                   | 127   | 41 (27- 52)                    | 43 (30- 54)               |
| 12+   | 45522                                                      | 875   | 68 (65- 70)                    | 68 (65- 70)               | 26809                                                       | 717   | 68 (66- 71)                    | 61 (58- 64)               | 13340                                                  | 691   | 55 (51- 58)                    | 47 (43- 51)               |
| 16+   | 45479                                                      | 874   | 68 (66- 70)                    | 68 (65- 70)               | 26807                                                       | 717   | 69 (67- 71)                    | 61 (58- 64)               | 13340                                                  | 691   | 56 (52- 59)                    | 47 (43- 51)               |

**b. Adjusted\* vaccine effectiveness, with 95% confidence intervals, against SARS-CoV-2 hospitalization, by age group and number of months since being fully vaccinated with BNT162b2, Kaiser Permanente Southern California, December 14th 2020 – August 8th, 2021**

|  | Fully vaccinated < 1 month (7-36 days after 2nd dose) | Fully vaccinated 1- <2 months (37-66 days after 2nd dose) | Fully vaccinated 2- <3 months (67-96 days after 2nd dose) |
|--|-------------------------------------------------------|-----------------------------------------------------------|-----------------------------------------------------------|
|--|-------------------------------------------------------|-----------------------------------------------------------|-----------------------------------------------------------|

| Age   | Person-years | Cases | VE <sub>unadj</sub> ** (95%CI) | VE <sub>adj</sub> (95%CI) | Person-years | Cases | VE <sub>unadj</sub> ** (95%CI) | VE <sub>adj</sub> (95%CI) | Person-years | Cases | VE <sub>unadj</sub> ** (95%CI) | VE <sub>adj</sub> (95%CI) |
|-------|--------------|-------|--------------------------------|---------------------------|--------------|-------|--------------------------------|---------------------------|--------------|-------|--------------------------------|---------------------------|
| 12-15 | 5782         | 0     | 100 (100-100)                  | 100 (100-100)             | 3464         | 1     | 74 (-101- 97)                  | 69 (-145- 96)             | 320          | 0     | 100 (100-100)                  | 100 (100-100)             |
| 16-44 | 32742        | 8     | 87 (73- 93)                    | 88 (75- 94)               | 30293        | 6     | 91 (79- 96)                    | 91 (80- 96)               | 24895        | 2     | 97 (90- 99)                    | 98 (90- 99)               |
| 45-64 | 25017        | 7     | 91 (81- 96)                    | 91 (82- 96)               | 23944        | 12    | 84 (72- 91)                    | 86 (75- 92)               | 21439        | 12    | 90 (82- 94)                    | 91 (83- 95)               |
| 65+   | 18519        | 19    | 83 (73- 89)                    | 84 (74- 90)               | 18234        | 12    | 87 (76- 93)                    | 88 (78- 93)               | 17725        | 10    | 87 (76- 93)                    | 89 (78- 94)               |
| 12+   | 82061        | 34    | 84 (77- 89)                    | 87 (82- 91)               | 75935        | 31    | 84 (78- 89)                    | 88 (83- 92)               | 64378        | 24    | 89 (83- 93)                    | 92 (89- 95)               |
| 16+   | 76279        | 34    | 84 (77- 88)                    | 87 (82- 91)               | 72471        | 30    | 84 (78- 89)                    | 89 (84- 92)               | 64058        | 24    | 90 (85- 93)                    | 92 (89- 95)               |

| Age   | Fully vaccinated 3- <4 months (97-126 days after 2nd dose) |       |                                |                           | Fully vaccinated 4- <5 months (127-156 days after 2nd dose) |       |                                |                           | Fully vaccinated >=5 months (157+ days after 2nd dose) |       |                                |                           |
|-------|------------------------------------------------------------|-------|--------------------------------|---------------------------|-------------------------------------------------------------|-------|--------------------------------|---------------------------|--------------------------------------------------------|-------|--------------------------------|---------------------------|
|       | Person-years                                               | Cases | VE <sub>unadj</sub> ** (95%CI) | VE <sub>adj</sub> (95%CI) | Person-years                                                | Cases | VE <sub>unadj</sub> ** (95%CI) | VE <sub>adj</sub> (95%CI) | Person-years                                           | Cases | VE <sub>unadj</sub> ** (95%CI) | VE <sub>adj</sub> (95%CI) |
| 12-15 | 44                                                         | 0     | 100 (100-100)                  | 100 (100-100)             | 2                                                           | 0     | 100 (100-100)                  | 100 (100-100)             | 1                                                      | 0     | 100 (100-100)                  | 100 (100-100)             |
| 16-44 | 15185                                                      | 4     | 93 (82- 97)                    | 94 (85- 98)               | 6998                                                        | 4     | 84 (57- 94)                    | 88 (67- 95)               | 4944                                                   | 3     | 87 (60- 96)                    | 90 (69- 97)               |
| 45-64 | 14889                                                      | 8     | 93 (86- 97)                    | 94 (88- 97)               | 7127                                                        | 3     | 94 (82- 98)                    | 95 (84- 98)               | 4829                                                   | 5     | 90 (75- 96)                    | 90 (75- 96)               |
| 65+   | 16797                                                      | 15    | 85 (74- 91)                    | 86 (77- 92)               | 13335                                                       | 30    | 83 (74- 88)                    | 85 (77- 90)               | 3853                                                   | 13    | 81 (66- 89)                    | 83 (69- 90)               |
| 12+   | 46916                                                      | 27    | 86 (80- 91)                    | 93 (89- 95)               | 27461                                                       | 37    | 75 (66- 82)                    | 91 (87- 93)               | 13627                                                  | 21    | 77 (65- 85)                    | 88 (82- 92)               |
| 16+   | 46872                                                      | 27    | 88 (82- 92)                    | 93 (89- 95)               | 27460                                                       | 37    | 78 (69- 84)                    | 91 (87- 93)               | 13626                                                  | 21    | 80 (69- 87)                    | 88 (82- 92)               |

\*VE estimates and 95% confidence intervals calculated via Cox regression models adjusted for: age, sex, race/ethnicity, prior PCR positive SARS-CoV-2, prior healthcare utilization (inpatient, outpatient, emergency department, virtual), BMI, acute myocardial infarction, congestive heart failure, cerebrovascular disease, peripheral vascular disease, organ transplant, diabetes mellitus, malignancy, renal disease, chronic obstructive pulmonary disease, hypertension, Charlson index, influenza vaccination year prior to index date, pneumococcal vaccination 5 years prior to index date, neighborhood deprivation index, and account for calendar time and time-varying vaccination status.

\*\* The unadjusted VE estimates account for calendar time and use time-varying vaccination status

**Appendix Table 7· Adjusted\* vaccine effectiveness with 95% confidence intervals against SARS-CoV-2 infection and hospitalization with BNT162b2, by vaccination status and sequencing result, Kaiser Permanente Southern California, December 14th 2020 – August 8th, 2021**

|                                           | Unvaccinated |       | Partially vaccinated (1 dose + 14 days, no 2nd dose) |       |                                |                               | 2nd dose, partially vaccinated (<7 days after 2nd dose) |       |                                |                               | Fully vaccinated (2nd dose + 7 days) |       |                                |                               |
|-------------------------------------------|--------------|-------|------------------------------------------------------|-------|--------------------------------|-------------------------------|---------------------------------------------------------|-------|--------------------------------|-------------------------------|--------------------------------------|-------|--------------------------------|-------------------------------|
|                                           | Person-years | Cases | Person-years                                         | Cases | VE <sub>unadj</sub> ** (95%CI) | VE <sub>adj</sub> , % (95%CI) | Person-years                                            | Cases | VE <sub>unadj</sub> ** (95%CI) | VE <sub>adj</sub> , % (95%CI) | Person-years                         | Cases | VE <sub>unadj</sub> ** (95%CI) | VE <sub>adj</sub> , % (95%CI) |
| <b>Infection with Delta Variant</b>       | 118683<br>8  | 994   | 32916                                                | 13    | 75 (58- 86)                    | 74 (55- 85)                   | 18508                                                   | 1     | 94 (56- 99)                    | 93 (50- 99)                   | 252881                               | 199   | 77 (73- 80)                    | 75 (71- 78)                   |
| <b>Hospitalization with Delta Variant</b> | 123499<br>9  | 92    | 34373                                                | 1     | 79 (-54- 97)                   | 79 (-49- 97)                  | 19287                                                   | 0     | 100 (100-100)                  | 100 (100-100)                 | 261945                               | 7     | 91 (80- 96)                    | 93 (84- 96)                   |
| <b>Infection with Other Variant</b>       | 118683<br>8  | 3023  | 32916                                                | 38    | 74 (64- 81)                    | 74 (64- 81)                   | 18508                                                   | 10    | 88 (78- 94)                    | 88 (78- 94)                   | 252881                               | 93    | 91 (89- 93)                    | 91 (88- 92)                   |

|                                               |             |      |       |    |             |             |       |    |               |               |        |     |             |             |
|-----------------------------------------------|-------------|------|-------|----|-------------|-------------|-------|----|---------------|---------------|--------|-----|-------------|-------------|
| <b>Hospitalization with Other Variant</b>     | 123497<br>3 | 176  | 34372 | 3  | 67 (-2- 90) | 75 (21- 92) | 19287 | 0  | 100 (100-100) | 100 (100-100) | 261943 | 7   | 91 (81- 96) | 95 (90- 98) |
| <b>Infection with Failed Sequencing</b>       | 118684<br>2 | 2593 | 32914 | 73 | 43 (28- 55) | 42 (27- 54) | 18508 | 15 | 77 (62- 86)   | 77 (61- 86)   | 252869 | 331 | 73 (69- 76) | 72 (68- 75) |
| <b>Hospitalization with failed sequencing</b> | 123496<br>6 | 227  | 34371 | 5  | 58 (-3- 83) | 65 (16- 86) | 19287 | 0  | 100 (100-100) | 100 (100-100) | 261936 | 37  | 65 (49- 75) | 77 (67- 85) |

\*VE estimates and 95% confidence intervals calculated via Cox regression models adjusted for: age, sex, race/ethnicity, prior PCR positive SARS-CoV-2, prior healthcare utilization (inpatient, outpatient, emergency department, virtual), BMI, acute myocardial infarction, congestive heart failure, cerebrovascular disease, peripheral vascular disease, organ transplant, diabetes mellitus, malignancy, renal disease, chronic obstructive pulmonary disease, hypertension, Charlson index, influenza vaccination year prior to index date, pneumococcal vaccination 5 years prior to index date, neighborhood deprivation index, and account for calendar time and time-varying vaccination status.

\*\* The unadjusted VE estimates account for calendar time and use time-varying vaccination status

**Appendix Table 8· Adjusted\* vaccine effectiveness with 95% confidence intervals against SARS-CoV-2 infection with BNT162b2, by month since full vaccination and sequencing result, Kaiser Permanente Southern California, December 14th 2020 – August 8th, 2021**

|                                         | Fully vaccinated < 1 month (7-36 days after 2 <sup>nd</sup> dose) |              |                                      |                                    | Fully vaccinated 1 - < 2 months (37-66 days after 2 <sup>nd</sup> dose) |              |                                      |                                    | Fully vaccinated 2 - < 3 months (67-96 days after 2 <sup>nd</sup> dose) |              |                                      |                                    |
|-----------------------------------------|-------------------------------------------------------------------|--------------|--------------------------------------|------------------------------------|-------------------------------------------------------------------------|--------------|--------------------------------------|------------------------------------|-------------------------------------------------------------------------|--------------|--------------------------------------|------------------------------------|
|                                         | <i>Person-years</i>                                               | <i>Cases</i> | <i>VE<sub>unadj.</sub>** (95%CI)</i> | <i>VE<sub>adj.</sub> % (95%CI)</i> | <i>Person-years</i>                                                     | <i>Cases</i> | <i>VE<sub>unadj.</sub>** (95%CI)</i> | <i>VE<sub>adj.</sub> % (95%CI)</i> | <i>Person-years</i>                                                     | <i>Cases</i> | <i>VE<sub>unadj.</sub>** (95%CI)</i> | <i>VE<sub>adj.</sub> % (95%CI)</i> |
| <b>Infection with Delta Variant</b>     | 76282                                                             | 7            | 94 (87- 97)                          | 93 (85- 97)                        | 67360                                                                   | 21           | 88 (81- 92)                          | 88 (81- 92)                        | 52700                                                                   | 45           | 78 (70- 84)                          | 78 (70- 83)                        |
| <b>Infection with Other Variant</b>     | 76282                                                             | 10           | 97 (95- 99)                          | 97 (95- 99)                        | 67360                                                                   | 25           | 92 (88- 94)                          | 91 (87- 94)                        | 52700                                                                   | 23           | 88 (82- 92)                          | 88 (81- 92)                        |
| <b>Infection with Failed Sequencing</b> | 76280                                                             | 52           | 84 (78- 88)                          | 83 (77- 87)                        | 67358                                                                   | 86           | 73 (66- 78)                          | 72 (65- 77)                        | 52697                                                                   | 71           | 73 (65- 78)                          | 72 (64- 78)                        |

|                                         | Fully vaccinated 3 - < 4 months (97 - 126 days after 2 <sup>nd</sup> dose) |              |                                      |                                    | Fully vaccinated >= 4 months (127+ days after 2 <sup>nd</sup> dose) |              |                                      |                                    |
|-----------------------------------------|----------------------------------------------------------------------------|--------------|--------------------------------------|------------------------------------|---------------------------------------------------------------------|--------------|--------------------------------------|------------------------------------|
|                                         | <i>Person-years</i>                                                        | <i>Cases</i> | <i>VE<sub>unadj.</sub>** (95%CI)</i> | <i>VE<sub>adj.</sub> % (95%CI)</i> | <i>Person-years</i>                                                 | <i>Cases</i> | <i>VE<sub>unadj.</sub>** (95%CI)</i> | <i>VE<sub>adj.</sub> % (95%CI)</i> |
| <b>Infection with Delta Variant</b>     | 34761                                                                      | 64           | 68 (59- 75)                          | 60 (48- 69)                        | 21777                                                               | 62           | 62 (51- 71)                          | 53 (39- 65)                        |
| <b>Infection with Other Variant</b>     | 34761                                                                      | 19           | 81 (70- 88)                          | 80 (69- 87)                        | 21777                                                               | 16           | 68 (48- 81)                          | 67 (45- 80)                        |
| <b>Infection with Failed Sequencing</b> | 34759                                                                      | 62           | 67 (57- 74)                          | 64 (54- 73)                        | 21775                                                               | 60           | 50 (36- 62)                          | 47 (30- 59)                        |

\*VE estimates and 95% confidence intervals calculated via Cox regression models adjusted for: age, sex, race/ethnicity, prior PCR positive SARS-CoV-2, prior healthcare utilization (inpatient, outpatient, emergency department, virtual), BMI, acute myocardial infarction, congestive heart failure, cerebrovascular disease, peripheral vascular disease, organ transplant, diabetes mellitus, malignancy, renal disease, chronic obstructive pulmonary disease, hypertension, Charlson index, influenza vaccination year prior to index date, pneumococcal vaccination 5 years prior to index date, neighborhood deprivation index, and account for calendar time and time-varying vaccination status.

\*\* The unadjusted VE estimates account for calendar time and use time-varying vaccination status

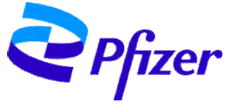

## NON-INTERVENTIONAL (NI) STUDY PROTOCOL

This document contains confidential information belonging to Pfizer. Except as otherwise agreed to in writing, by accepting or reviewing this document, you agree to hold this information in confidence and not copy or disclose it to others (except where required by applicable law) or use it for unauthorized purposes. In the event of any actual or suspected breach of this obligation, Pfizer must be promptly notified.

PFIZER CONFIDENTIAL

CT24-WI-GL02-RF02 2.0 *Non-Interventional Study Protocol Template For Secondary Data Collection Study*

15-Aug-2018

Page 1 of 42

**Study information**

|                                         |                                                                                                                                                                                                                                                                                                                                                                                                                                                                                                                                                                                                                                                                                                                                                                                         |
|-----------------------------------------|-----------------------------------------------------------------------------------------------------------------------------------------------------------------------------------------------------------------------------------------------------------------------------------------------------------------------------------------------------------------------------------------------------------------------------------------------------------------------------------------------------------------------------------------------------------------------------------------------------------------------------------------------------------------------------------------------------------------------------------------------------------------------------------------|
| <b>Title</b>                            | <i>Pfizer-BioNTech COVID-19 BNT162b2 Vaccine Effectiveness Study - Kaiser Permanente Southern California</i>                                                                                                                                                                                                                                                                                                                                                                                                                                                                                                                                                                                                                                                                            |
| <b>Protocol number</b>                  | C4591014                                                                                                                                                                                                                                                                                                                                                                                                                                                                                                                                                                                                                                                                                                                                                                                |
| <b>Protocol version identifier</b>      | <i>Version 1.0</i>                                                                                                                                                                                                                                                                                                                                                                                                                                                                                                                                                                                                                                                                                                                                                                      |
| <b>Date</b>                             | 22 March 2021                                                                                                                                                                                                                                                                                                                                                                                                                                                                                                                                                                                                                                                                                                                                                                           |
| <b>Research question and objectives</b> | <p>The primary objective of this study is to estimate vaccine effectiveness (VE) of 2-doses of Pfizer’s BNT162b2 (fully vaccinated) against acute respiratory illness requiring hospitalization due to SARS-CoV-2 infection among KPSC members <math>\geq 12</math> years of age. Secondary and exploratory objectives will examine VE for 1 dose vaccination, at least 1 dose, as well as against ED admission, specific variants and other populations of interest.</p> <p>To assess vaccine effectiveness (VE), we propose a large retrospective database study using two parallel study designs: a test-negative case-control design and a retrospective cohort design. We will conduct additional analyses of VE estimates by various patient characteristics and strain type.</p> |
| <b>Author</b>                           | <p>Sara Y. Tartof, PhD MPH<br/>Kaiser Permanente Southern California Department of Research &amp; Evaluation<br/><i>Sara.y.tartof@kp.org</i><br/>(626)564-3001</p> <p>Heidi Fischer, PhD MS<br/>Kaiser Permanente Southern California Department of Research &amp; Evaluation<br/><i>Heidi.fischer@kp.org</i><br/>(626)564-3290</p> <p>Jeff Slezak, MS<br/>Kaiser Permanente Southern California Department of Research &amp; Evaluation</p>                                                                                                                                                                                                                                                                                                                                            |

PFIZER CONFIDENTIAL

|  |                                                                                                                                                                                                                                                                                                                                                      |
|--|------------------------------------------------------------------------------------------------------------------------------------------------------------------------------------------------------------------------------------------------------------------------------------------------------------------------------------------------------|
|  | <p><i>Jeff.m.slezak@kp.org</i><br/>(626)564-3477</p> <p>John M. McLaughlin, PhD<br/>Pfizer Vaccines<br/>Medical Development and Scientific/Clinical Affairs<br/><i>john.mclaughlin@pfizer.com</i></p> <p>Fred Angulo, DVM PhD<br/>Pfizer Vaccines<br/>Medical Development and Scientific/Clinical Affairs<br/><i>frederick.angulo@pfizer.com</i></p> |
|--|------------------------------------------------------------------------------------------------------------------------------------------------------------------------------------------------------------------------------------------------------------------------------------------------------------------------------------------------------|

PFIZER CONFIDENTIAL

## 1. TABLE OF CONTENTS

|                                                                                                              |    |
|--------------------------------------------------------------------------------------------------------------|----|
| 1. TABLE OF CONTENTS.....                                                                                    | 4  |
| 2. LIST OF ABBREVIATIONS.....                                                                                | 6  |
| 3. RESPONSIBLE PARTIES.....                                                                                  | 8  |
| 4. ABSTRACT.....                                                                                             | 8  |
| 5. AMENDMENTS AND UPDATES.....                                                                               | 10 |
| 6. MILESTONES.....                                                                                           | 10 |
| 7. RATIONALE AND BACKGROUND.....                                                                             | 11 |
| 8. RESEARCH QUESTION AND OBJECTIVES .....                                                                    | 12 |
| 9. RESEARCH METHODS .....                                                                                    | 16 |
| 9.1. Research Setting.....                                                                                   | 16 |
| 9.2. Study design.....                                                                                       | 18 |
| 9.2.1. Inclusion criteria .....                                                                              | 20 |
| 9.2.2. Exclusion criteria.....                                                                               | 20 |
| 9.3. Variables.....                                                                                          | 21 |
| 9.3.1. Test Negative Design Outcomes and Exposures.....                                                      | 21 |
| 9.3.2. Full Cohort Design Outcome and Exposures .....                                                        | 22 |
| 9.3.3. Test-Negative and Full Cohort Designs – Outside Vaccinations .....                                    | 23 |
| 9.3.4. Test-Negative and Full Cohort Designs - Covariates .....                                              | 24 |
| 9.4. Data sources .....                                                                                      | 24 |
| 9.5. Study size .....                                                                                        | 25 |
| 9.6. Data management.....                                                                                    | 29 |
| 9.6.1. Electronic data records .....                                                                         | 29 |
| 9.6.2. Record retention.....                                                                                 | 29 |
| 9.7. Data analysis .....                                                                                     | 30 |
| 9.7.1. Test Negative Design Analyses.....                                                                    | 30 |
| 9.7.1.1. Descriptive Analyses.....                                                                           | 30 |
| 9.7.1.2. Estimated Crude (Unadjusted) VE.....                                                                | 30 |
| 9.7.1.3. Estimating Adjusted VE.....                                                                         | 31 |
| 9.7.1.4. Sensitivity Analyses .....                                                                          | 31 |
| 9.7.1.5. Exploratory analyses estimating VE for health care<br>workers and other high risk populations ..... | 31 |

PFIZER CONFIDENTIAL



|                                                                                                              |    |
|--------------------------------------------------------------------------------------------------------------|----|
| 9.7.2. Full Cohort Design Analyses.....                                                                      | 33 |
| 9.7.2.1. Descriptive Analyses.....                                                                           | 33 |
| 9.7.2.2. Estimated Crude (Unadjusted) VE.....                                                                | 33 |
| 9.7.2.3. Estimating Adjusted VE.....                                                                         | 33 |
| 9.7.2.4. Sensitivity Analyses .....                                                                          | 33 |
| 9.7.2.5. Exploratory analyses estimating VE for health care<br>workers and other high risk populations ..... | 34 |
| 9.7.3. Additional Analytic Elements for Test Negative and Full Cohort<br>Design .....                        | 34 |
| 9.8. Quality control.....                                                                                    | 35 |
| 9.9. Limitations of the research methods .....                                                               | 36 |
| 9.10. Other aspects .....                                                                                    | 36 |
| 10. PROTECTION OF HUMAN SUBJECTS .....                                                                       | 37 |
| 10.1. Patient information.....                                                                               | 37 |
| 10.2. Patient consent.....                                                                                   | 37 |
| 10.3. Institutional Review Board (IRB)/Independent Ethics Committee (IEC) .....                              | 37 |
| 10.4. Ethical conduct of the study .....                                                                     | 37 |
| 11. MANAGEMENT AND REPORTING OF ADVERSE EVENTS/ADVERSE<br>REACTIONS .....                                    | 38 |
| 12. PLANS FOR DISSEMINATING AND COMMUNICATING STUDY RESULTS.....                                             | 38 |
| 13. REFERENCES .....                                                                                         | 39 |
| 14. LIST OF TABLES .....                                                                                     | 40 |
| 15. LIST OF FIGURES .....                                                                                    | 40 |
| 16. ANNEX 1. LIST OF STAND ALONE DOCUMENTS .....                                                             | 40 |
| 17. ANNEX 2. ADDITIONAL INFORMATION.....                                                                     | 40 |

## 2. LIST OF ABBREVIATIONS

| <b>Abbreviation</b> | <b>Definition</b>                                  |
|---------------------|----------------------------------------------------|
| AE                  | adverse event                                      |
| ARI                 | Acute Respiratory Infection                        |
| BMI                 | body mass index                                    |
| CAIR                | California Immunization Registry                   |
| CHIP                | Children's Health Insurance Program                |
| CI                  | confidence interval                                |
| CLIA                | Clinical Laboratory Improvement Amendments of 1988 |
| COPD                | Chronic Obstructive Pulmonary Disease              |
| COVID-19            | coronavirus Disease 2019                           |
| CSR                 | Clinical Study Report                              |
| ED                  | emergency department                               |
| EHR                 | electronic health record                           |
| EUA                 | Emergency Use Authorization                        |
| GEE                 | generalized estimating equations                   |
| HCW                 | health care worker                                 |
| HR                  | hazard ratio                                       |
| ICD                 | International Classification of Diseases           |
| ICMJE               | International Committee of Medical Journal Editors |
| ICU                 | Intensive Care Unit                                |
| IEC                 | Independent Ethics Committee                       |
| IRB                 | Institutional Review Board                         |
| KPSC                | Kaiser Permanente Southern California              |
| LOS                 | length of stay                                     |
| LTCF                | long term care facility                            |
| mRNA                | modified ribonucleic acid                          |
| NIS                 | non-interventional study                           |
| NLP                 | Natural Language Processing                        |
| OR                  | odds ratio                                         |
| PCR                 | polymerase chain reaction                          |
| PHI                 | protected health information                       |
| RSV                 | Respiratory Syncytial Virus                        |
| RT-PCR              | Reverse Transcriptase Polymerase Chain Reaction    |
| SAE                 | serious adverse event                              |
| SAP                 | Statistical Analysis Plan                          |
| SARS-CoV-2          | Severe Acute Respiratory Syndrome Coronavirus 2    |
| SAS                 | Statistical Analysis Software                      |
| SDIR                | San Diego Immunization Registry                    |
| SOC                 | Standard of Care                                   |
| TND                 | test-negative design                               |

PFIZER CONFIDENTIAL

| <b>Abbreviation</b> | <b>Definition</b>       |
|---------------------|-------------------------|
| US                  | United States           |
| VE                  | vaccine effectiveness   |
| WGS                 | whole genome sequencing |

PFIZER CONFIDENTIAL

CT24-WI-GL02-RF02 2.0 *Non-Interventional Study Protocol Template For Secondary Data Collection Study*

15-Aug-2018

Page 7 of 42

### 3. RESPONSIBLE PARTIES

#### Principal Investigator(s) of the Protocol

| Name, degree(s)             | Job Title                               | Affiliation                                                                           | Address                                                         |
|-----------------------------|-----------------------------------------|---------------------------------------------------------------------------------------|-----------------------------------------------------------------|
| Sara Y. Tartof, PhD,<br>MPH | Research Scientist                      | Department of Research<br>and Evaluation<br>Kaiser Permanente,<br>Southern California | 100 South Los Robles,<br>2nd Floor<br>Pasadena, CA 91101<br>USA |
| Heidi Fischer, PhD, MS      | Research Scientist Bio-<br>statistician | Department of Research<br>and Evaluation<br>Kaiser Permanente,<br>Southern California | 100 South Los Robles,<br>6th Floor<br>Pasadena, CA 91101<br>USA |
| Jeff Slezak, MS             | Research Scientist Bio-<br>statistician | Department of Research<br>and Evaluation<br>Kaiser Permanente,<br>Southern California | 100 South Los Robles,<br>6th Floor<br>Pasadena, CA 91101<br>USA |
| Fred Angulo, DVM PhD        | Epidemiologist                          | Medical Development<br>and Scientific/Clinical<br>Affairs, Pfizer Vaccines            | 500 Arcola Rd, Col-<br>legeville, PA 19426<br>USA               |
| John McLaughlin, PhD        | Epidemiologist                          | Medical Development<br>and Scientific/Clinical<br>Affairs, Pfizer Vaccines            | 500 Arcola Rd., Col-<br>legeville, PA 19426<br>USA              |

### 4. ABSTRACT

BNT162b2 is a modified RNA (mRNA) vaccine administered as 2 doses 21 days apart that encodes the full-length, membrane-anchored S glycoprotein of SARS-CoV-2 with two introduced proline mutations to lock it in the prefusion conformation. It was co-developed by BioNTech SE and Pfizer, Inc. The vaccine showed an acceptable safety profile in a Phase 1/2 study<sup>1</sup> and was tolerable and demonstrated a 95% clinical efficacy  $\geq 7$  days after the second dose against COVID-19 in persons without current or prior SARS-CoV-2 infection in a Phase 3 trial<sup>2</sup>. Pfizer-BioNTech COVID-19 Vaccine is authorized for use under an Emergency Use Authorization (EUA) for active immunization to prevent coronavirus disease 2019 (COVID-19) caused by severe acute respiratory syndrome coronavirus 2 (SARS-CoV-2) in individuals 12 years of age and older. Data confirming the effectiveness of the vaccine outside of the clinical setting are needed.

The primary objective of this study is to estimate the vaccine effectiveness (VE) of 2-doses of Pfizer's BNT162b2 (fully vaccinated) vaccine against acute respiratory illness requiring hospitalization due to SARS-CoV-2 infection among KPSC members  $\geq 12$  years of age. Secondary and exploratory objectives will examine VE for 1 dose vaccination, at least 1 dose, as well as against emergency department (ED) admission, specific variants and other populations of interest.

To assess VE, we propose a large retrospective database study using two parallel study designs: a test-negative case-control design and a retrospective cohort design. The test-negative design (TND) will assess VE against COVID-19 hospitalization (primary endpoint) and

PFIZER CONFIDENTIAL

ED admission. The retrospective cohort analysis will assess VE against COVID-19 hospitalization (primary), ICU admission, death, ED admission, and outpatient disease (with no subsequent hospitalization within 14 days). We will further conduct additional analyses of VE estimates by various patient characteristics and strain type.

This study will be conducted at Kaiser Permanente Southern California (KPSC), an integrated health care organization comprising one of the largest health insurance plans in the US, a hospital system, and >7,600 physicians and 27,000 nurses located throughout 9 counties of Southern California. For the TND, the study population will include all KPSC patients 12 years or older who are admitted to the hospital or present to the ED with acute respiratory infection (ARI) after 14 December 2020 (date of first vaccinations at KPSC), and who receive a PCR test for SARS-CoV-2. For the Full Cohort Design, the study population will include all KPSC members as of 14 December 2020 (date of first Pfizer vaccination at KPSC) aged 12 and older.

Vaccine exposure for both study designs include fully vaccinated, defined as 2 doses of BNT162b2 received with  $\geq 7$  days between receipt of the 2<sup>nd</sup> dose and the event date (e.g., admission); partially vaccinated, defined as 1 dose (only) of BNT162b2 received with  $\geq 14$  days between the receipt of the 1<sup>st</sup> dose and the event date; and ever vaccinated, defined as  $\geq 1$  dose of BNT162b2 received with  $\geq 14$  days between the receipt of the 1<sup>st</sup> dose and the event date. The unexposed group will include individuals with no record of COVID-19 vaccination at the time of the event and will serve as the reference group in all VE analyses. All data will be collected from KPSC electronic health records (EHRs).

## 5. AMENDMENTS AND UPDATES

| Amendment number | Date      | Protocol section(s) changed        | Summary of amendment(s)            | Reason                                                                                                                     |
|------------------|-----------|------------------------------------|------------------------------------|----------------------------------------------------------------------------------------------------------------------------|
| 1                | 12May2021 | Section's 4; 7; 8; 9.2; 9.2.1; 9.5 | Expanded age group for ages 12 -15 | 12May2021: (assuming panel approves today)<br><br>EUA approval by FDA and CDC to expand age group to include ages 12 – 15. |
|                  |           |                                    |                                    |                                                                                                                            |

## 6. MILESTONES

| Milestone                                     | Planned date    |
|-----------------------------------------------|-----------------|
| Start of data collection                      | 15 May 2021     |
| Final SAP                                     | 17 May 2021     |
| Interim Data Analysis/Report 1                | 30 June 2021    |
| Final Study Report on Primary Data Collection | 30 July 2022    |
| Secondary and exploratory data collection     | 30 July 2023    |
| Final Clinical Study Report (CSR)             | 01 January 2024 |
| Submit Manuscript for Publication             | 15 March 2024   |

PFIZER CONFIDENTIAL

## 7. RATIONALE AND BACKGROUND

The outbreak of the 2019 novel coronavirus disease (COVID-19), which is caused by severe acute respiratory syndrome-related coronavirus 2 (SARS-CoV-2), is still a pandemic threat to global public health. Although the epicenter of the COVID-19 outbreak in December of 2019 was in Wuhan, China, the disease has spread to more than 200 countries with more than 117 million confirmed cases and 2.6 million confirmed deaths worldwide as of 09 March 2019. In addition, essentially everyone's lives have been affected as a result of mandatory isolation and quarantine measures. The ripple effect of the COVID-19 outbreak has brought major challenges to health systems across the world and has had far-reaching impacts on the global economy. So far, public health experts have largely only been able to employ nonpharmaceutical intervention strategies to mitigate and control the spread of the virus. Now that safe and effective vaccines are available, further evaluation of their effectiveness outside of the clinical trial setting are needed following their introduction into the general population.

BNT162b2 is a modified RNA vaccine recommended as 2 doses 21 days apart that encodes the full-length, membrane-anchored S glycoprotein of SARS-CoV-2 with two introduced proline mutations to lock it in the prefusion conformation. It was co-developed by BioNTech SE and Pfizer, Inc. The vaccine showed an acceptable safety profile in a Phase 1/2 study<sup>1</sup>. In a Phase 3 trial, the vaccine was tolerable and demonstrated 95% efficacy  $\geq 7$  days after second dose against COVID-19 in persons without current or prior SARS-CoV-2 infection<sup>2</sup>. The vaccine is currently authorized for use under an Emergency Use Authorization (EUA) for active immunization to prevent coronavirus disease 2019 (COVID-19) caused by severe acute respiratory syndrome coronavirus 2 (SARS-CoV-2) in individuals 12 years of age and older and data confirming the effectiveness of the vaccine outside of the clinical setting are needed.

As such, this study will be conducted in Kaiser Permanente Southern California (KPSC), a large integrated healthcare organization with over 4.7 million members who comprise a socioeconomically diverse and broadly representative population that reflects of the racial/ethnic groups living in Southern California. As of 23 February 2021, KPSC has had over 441,000 COVID-19 cases and approximately 29,000 confirmed patients admitted to the hospital and has vaccinated more than 311,000 individuals. KPSC has 2 Regional Laboratories that process COVID-19 and other specimens. The central reference laboratories receive more than 50,000 specimens per day from the local laboratories and perform over 29 million tests annually. All laboratories undergo routine quality checks to meet or surpass accrediting body specifications.

## 8. RESEARCH QUESTION AND OBJECTIVES

The primary objective of the study is to estimate vaccine effectiveness (VE) of 2 doses of Pfizer’s BNT162b2 vaccine (i.e., fully vaccinated) against acute respiratory illness (ARI) requiring hospitalization due to SARS-CoV-2 infection among KPSC members  $\geq 12$  years of age. VE will be evaluated using a test-negative design (TND), including all KPSC patients 12 years or older who are admitted to the hospital with acute respiratory infection (ARI) after 14 December 14 2020 (date of first vaccinations at KPSC), and who receive a PCR test for SARS-CoV-2. Secondary and exploratory objectives will examine VE for 1 dose vaccination, at least 1 dose, as well as against ED admission, specific variants and other populations of interest. Additionally, we will estimate VE using a full cohort design, including all KPSC members 12 years or older. Table 1 and Table 2 outline all primary, secondary and exploratory objectives for the current study for the TND and full cohort designs, respectively. Additional sensitivity analyses are not described below, but rather are outlined in the subsequent Analysis section. To assess VE, we propose a large retrospective database study using two parallel study designs: a test-negative case-control design and a retrospective cohort design. The test-negative design (TND) will assess VE against COVID-19 hospitalization (primary endpoint) and ED admission. The retrospective cohort analysis will assess VE against COVID-19 hospitalization (primary), ICU admission, death, ED admission, and outpatient disease (with no subsequent hospitalization within 14 days). We will further conduct additional analyses of VE estimates by various patient characteristics and strain type.

**Table 1. TND Study Design Proposed Objectives**

| Test-Negative Design                                                                                                                                                            |                                                                                                                                                                            |
|---------------------------------------------------------------------------------------------------------------------------------------------------------------------------------|----------------------------------------------------------------------------------------------------------------------------------------------------------------------------|
| Objectives                                                                                                                                                                      | Endpoints                                                                                                                                                                  |
| Primary:                                                                                                                                                                        | Primary:                                                                                                                                                                   |
| 1. To estimate the effectiveness of 2 doses of BNT162b2 (i.e., fully vaccinated) against hospitalization for ARI due to SARS-CoV-2 infection.                                   | VE calculated as 1 minus the odds ratio (OR) comparing the odds of being fully vaccinated (2 doses) with BNT162b2 for hospitalized cases and controls, multiplied by 100%. |
| Secondary:                                                                                                                                                                      | Secondary:                                                                                                                                                                 |
| 1. To estimate the effectiveness of 2 doses of BNT162b2 (i.e., fully vaccinated) against ED admission (without subsequent hospitalization) for ARI due to SARS-CoV-2 infection. | VE calculated as 1 minus the OR comparing the odds of being fully vaccinated (2 doses) with BNT162b2 for ED cases and controls, multiplied by 100%.                        |
| 2. To describe the effectiveness of only 1 dose of BNT162b2 (i.e., partially vaccinated) against hospitalization for ARI due to SARS-CoV-2 infection.                           | VE calculated as 1 minus the OR comparing the odds of being partially vaccinated with BNT162b2 (only 1 dose) for hospitalized cases and controls, multiplied by 100%.      |
| 3. To describe the effectiveness of only 1 dose of BNT162b2 (i.e., partially vaccinated) against ED admission (without subsequent                                               | VE calculated as 1 minus the OR comparing the odds of being partially vaccinated with BNT162b2 (only 1 dose) for ED cases and controls, multiplied by 100%.                |

PFIZER CONFIDENTIAL



**Table 1. TND Study Design Proposed Objectives**

| <b>Test-Negative Design</b>                                                                                                                                                                                                                                                                                                       |                                                                                                                                                                                                                                                                                                                                                                                                                                                                                                                                                           |
|-----------------------------------------------------------------------------------------------------------------------------------------------------------------------------------------------------------------------------------------------------------------------------------------------------------------------------------|-----------------------------------------------------------------------------------------------------------------------------------------------------------------------------------------------------------------------------------------------------------------------------------------------------------------------------------------------------------------------------------------------------------------------------------------------------------------------------------------------------------------------------------------------------------|
| hospitalization) for ARI due to SARS-CoV-2 infection.                                                                                                                                                                                                                                                                             |                                                                                                                                                                                                                                                                                                                                                                                                                                                                                                                                                           |
| 4. To describe the effectiveness of $\geq 1$ dose of BNT162b2 (i.e., ever vaccinated) against hospitalization for ARI due to SARS-CoV-2 infection.                                                                                                                                                                                | VE calculated as 1 minus the OR comparing the odds of ever being vaccinated ( $\geq 1$ dose) with BNT162b2 for hospitalized cases and controls, multiplied by 100%.                                                                                                                                                                                                                                                                                                                                                                                       |
| 5. To describe the effectiveness of $\geq 1$ dose of BNT162b2 (i.e., ever vaccinated) against ED admission (without subsequent hospitalization) for ARI due to SARS-CoV-2 infection.                                                                                                                                              | VE calculated as 1 minus the OR comparing the odds of ever being vaccinated ( $\geq 1$ dose) with BNT162b2 for ED cases and controls, multiplied by 100%.                                                                                                                                                                                                                                                                                                                                                                                                 |
| 6. To further describe the effectiveness of BNT162b2 against hospitalization and ED admission stratified by prevalent or important viral strains                                                                                                                                                                                  | BNT162b2 VE estimates stratified by virus variant (as determined by genome sequencing) and select descriptive analyses described above                                                                                                                                                                                                                                                                                                                                                                                                                    |
| 7. To evaluate the effectiveness of BNT162b2 against severe hospitalization-related outcomes (e.g., ICU admission, mechanical ventilation, and death)                                                                                                                                                                             | BNT162b2 VE estimates against severe outcomes including ICU admission, mechanical ventilation, and death.                                                                                                                                                                                                                                                                                                                                                                                                                                                 |
| <b>Tertiary/Exploratory:</b>                                                                                                                                                                                                                                                                                                      | <b>Tertiary/Exploratory:</b>                                                                                                                                                                                                                                                                                                                                                                                                                                                                                                                              |
| 1. Compare VE of models stratified by relevant vaccination phase time periods to understand how VE may change as vaccinated patient risk profiles change over time.                                                                                                                                                               | BNT162b2 VE estimates by vaccination phase                                                                                                                                                                                                                                                                                                                                                                                                                                                                                                                |
| 2. To estimate the effectiveness of 1, $\geq 1$ , or 2 doses of BNT162b2 (i.e., fully vaccinated) against hospitalization or ED for ARI due to SARS-CoV-2 infection.                                                                                                                                                              | VE calculated as 1 minus the OR comparing the odds of have 2, 1, or $\geq 1$ doses of BNT162b2 for hospitalized and ED cases and controls, multiplied by 100%.                                                                                                                                                                                                                                                                                                                                                                                            |
| 3. To further describe the effectiveness of BNT162b2 against hospitalization and ED admission stratified by various patient characteristics (e.g., age, sex, race/ethnicity, chronic medical conditions, history of SARS-CoV-2 infection, long-term care facility residence, pregnancy status, and receipt of influenza vaccine). | BNT162b2 VE estimates by age group<br>BNT162b2 VE estimates by sex<br>BNT162b2 VE estimates by presence of chronic medical conditions, history of SARS-CoV-2 infection, pregnancy status<br>BNT162b2 VE estimates by race/ethnicity<br>BNT162b2 VE estimates by receipt of influenza vaccine in the last year<br>BNT162b2 VE estimates among long-term care facility residents (hospital outcome only)<br>BNT162b2 VE estimates by time since vaccination<br>BNT162b2 VE estimates by time between first and second dose among those who received 2 doses |
| 4. To describe the proportion of hospitalized and ED patients with ARI where SARS-CoV-2 was identified.                                                                                                                                                                                                                           | Proportion of ARI hospitalizations where SARS-CoV-2 is identified.                                                                                                                                                                                                                                                                                                                                                                                                                                                                                        |

PFIZER CONFIDENTIAL

**Table 1. TND Study Design Proposed Objectives**

| Test-Negative Design                                                                                                                            |                                                                                                                                                                                                            |
|-------------------------------------------------------------------------------------------------------------------------------------------------|------------------------------------------------------------------------------------------------------------------------------------------------------------------------------------------------------------|
| 5. To summarize the proportion of patients who receive 0, 1, or 2 doses of BNT162b2 among hospitalized and ED patients.                         | Proportion of patients who receive 0, 1, and 2 doses of BNT162b2                                                                                                                                           |
| 6. To summarize the time between administration of the first and second dose of BNT162b2 among patients who received 2 doses                    | Average and median time between receipt of the first and second dose BNT162b2 among patients who received two doses                                                                                        |
| 7. To summarize the time since vaccination with BNT162b2 (most-recent dose) since vaccinations at KPSC began                                    | Average and median time between 14 December 2020 and receipt of last dose among patients receiving BNT162b2                                                                                                |
| 8. To describe demographic, clinical, and laboratory characteristics (i.e., viral strain) and disease severity of any BNT162b2 vaccine failures | Describe age, gender, race/ethnicity, clinical characteristics, and severity (ICU admission, ventilator, death) of any patients who received BNT162b2 and test positive for SARS-CoV-2                     |
| 9. To describe COVID-19 disease severity for vaccinated and unvaccinated cases in the TND design                                                | Describe disease severity for vaccinated and unvaccinated cases (e.g., average hospital length of stay (LOS), 30-day readmission, the proportion requiring ICU admission or mechanical ventilation, death) |

**Table 2. Full Cohort Study Design Proposed Objectives**

| Cohort Design                                                                                                                                                                        |                                                                                                                                                                                                       |
|--------------------------------------------------------------------------------------------------------------------------------------------------------------------------------------|-------------------------------------------------------------------------------------------------------------------------------------------------------------------------------------------------------|
| Objectives                                                                                                                                                                           | Endpoints                                                                                                                                                                                             |
| Primary:                                                                                                                                                                             | Primary:                                                                                                                                                                                              |
| 1. To estimate the effectiveness of 2 doses of BNT162b2 (i.e., fully vaccinated) against hospitalization due to SARS-CoV-2 infection.                                                | VE calculated as 1 minus the hazard ratio (HR) comparing the incidence of being fully vaccinated (2 doses) with BNT162b2 for hospitalization due to SARS-CoV-2 infection and not, multiplied by 100%. |
| Secondary:                                                                                                                                                                           | Secondary:                                                                                                                                                                                            |
| 1. To estimate the effectiveness of 2 doses of BNT162b2 (i.e., fully vaccinated) against ED admission (without subsequent hospitalization) ED admission due to SARS-CoV-2 infection. | VE calculated as 1 minus the HR comparing the incidence of being fully vaccinated (2 doses) with BNT162b2 for ED admission due to SARS-CoV-2 infection and not, multiplied by 100%.                   |
| 2. To estimate the effectiveness of 2 doses of BNT162b2 (i.e., fully vaccinated) against ICU admission due to SARS-CoV-2 infection                                                   | VE calculated as 1 minus the HR comparing the incidence of being fully vaccinated (2 doses) with BNT162b2 for ICU admission due to SARS-CoV-2 infection and not, multiplied by 100%.                  |
| 3. To estimate the effectiveness of 2 doses of BNT162b2 (i.e., fully vaccinated) against death due to SARS-CoV-2 infection                                                           | VE calculated as 1 minus the HR comparing the incidence of being fully vaccinated (2 doses) with BNT162b2 for death due to SARS-CoV-2 infection and not, multiplied by 100%.                          |

PFIZER CONFIDENTIAL

**Table 2. Full Cohort Study Design Proposed Objectives**

| <b>Cohort Design</b>                                                                                                                                                                                                                                                                     |                                                                                                                                                                                                                                                                                                                                                                                                                                                                                                                                                           |
|------------------------------------------------------------------------------------------------------------------------------------------------------------------------------------------------------------------------------------------------------------------------------------------|-----------------------------------------------------------------------------------------------------------------------------------------------------------------------------------------------------------------------------------------------------------------------------------------------------------------------------------------------------------------------------------------------------------------------------------------------------------------------------------------------------------------------------------------------------------|
| 4. To estimate the effectiveness of 2 doses of BNT162b2 (i.e., fully vaccinated) against COVID-19 outpatient visits (without subsequent hospitalization within 14 days) due to SARS-CoV-2 infection                                                                                      | VE calculated as 1 minus the HR comparing the incidence of being fully vaccinated (2 doses) with BNT162b2 for COVID-19 outpatient visits (without subsequent hospitalization within 14 days) due to SARS-CoV-2 infection and not, multiplied by 100%.                                                                                                                                                                                                                                                                                                     |
| 5. To describe the effectiveness of only 1 dose of BNT162b2 (i.e., partially vaccinated) against hospitalization, ED admission, ICU admission, death, and outpatient visits (without subsequent hospitalization within 14 days) due to SARS-CoV-2 infection.                             | VE calculated as 1 minus the HR comparing the incidence of only 1 dose of BNT162b2 (i.e., partially vaccinated) for hospitalization, ED visit, death, and COVID-19 outpatient visits (without subsequent hospitalization within 14 days) due to SARS-CoV-2 infection and not, multiplied by 100%.                                                                                                                                                                                                                                                         |
| 6. To describe the effectiveness of $\geq 1$ dose of BNT162b2 (i.e., ever vaccinated) against hospitalization, ICU admission, ED admission, death, and outpatient visits (without subsequent hospitalization within 14 days) due to SARS-CoV-2 infection.                                | VE calculated as 1 minus the HR comparing the incidence $\geq 1$ dose of BNT162b2 (i.e., ever vaccinated) for hospitalization, ED visit, death, and COVID-19 outpatient visits (without subsequent hospitalization within 14 days) due to SARS-CoV-2 infection and not, multiplied by 100%.                                                                                                                                                                                                                                                               |
| <b>Tertiary/Exploratory:</b>                                                                                                                                                                                                                                                             | <b>Tertiary/Exploratory:</b>                                                                                                                                                                                                                                                                                                                                                                                                                                                                                                                              |
| 1. Compare VE of models stratified by relevant vaccination phase time periods to understand how VE may change as vaccinated patient risk profiles change over time.                                                                                                                      | BNT162b2 VE estimates by vaccination phase                                                                                                                                                                                                                                                                                                                                                                                                                                                                                                                |
| 2. To further describe the effectiveness of BNT162b2 by durability of vaccine effectiveness after receipt of 2 doses.                                                                                                                                                                    | VE calculated as 1 minus the HR comparing the incidence of being fully vaccinated (2 doses) at various timepoints from vaccination for all outcomes, multiplied by 100%.                                                                                                                                                                                                                                                                                                                                                                                  |
| 3. To further describe the effectiveness of BNT162b2 stratified by various patient characteristics (e.g., age, sex, race/ethnicity, chronic medical conditions, history of SARS-CoV-2 infection, long-term care facility residence, pregnancy status, and receipt of influenza vaccine). | BNT162b2 VE estimates by age group<br>BNT162b2 VE estimates by sex<br>BNT162b2 VE estimates by presence of chronic medical conditions, history of SARS-CoV-2 infection, pregnancy status<br>BNT162b2 VE estimates by race/ethnicity<br>BNT162b2 VE estimates by receipt of influenza vaccine in the last year<br>BNT162b2 VE estimates among long-term care facility residents (hospital outcome only)<br>BNT162b2 VE estimates by time since vaccination<br>BNT162b2 VE estimates by time between first and second dose among those who received 2 doses |
| 4. To summarize the proportion of patients who receive 0, 1, or 2 doses of BNT162b2                                                                                                                                                                                                      | Proportion of patients who receive 0, 1, and 2 doses of BNT162b2                                                                                                                                                                                                                                                                                                                                                                                                                                                                                          |
| 5. To summarize the time between administration of the first and second dose of BNT162b2 among patients who received 2 doses                                                                                                                                                             | Average and median time between receipt of the first and second dose BNT162b2 among patients who received two doses                                                                                                                                                                                                                                                                                                                                                                                                                                       |
| 6. To summarize the time since vaccination with BNT162b2 (most-recent dose) from study enrollment                                                                                                                                                                                        | Average and median time between study enrollment and receipt of last dose among patients receiving BNT162b2                                                                                                                                                                                                                                                                                                                                                                                                                                               |

PFIZER CONFIDENTIAL

**Table 2. Full Cohort Study Design Proposed Objectives**

| Cohort Design                                                                                                                                                |                                                                                                                                                                                                     |
|--------------------------------------------------------------------------------------------------------------------------------------------------------------|-----------------------------------------------------------------------------------------------------------------------------------------------------------------------------------------------------|
| 7. Estimate overall incidence rates by vaccination status and by important demographic and clinical characteristics                                          | Incidence by vaccination status, age, gender, race/ethnicity, clinical characteristics outlined further below.                                                                                      |
| 8. To further describe the effectiveness of BNT162b2 stratified by prevalent or important viral strains                                                      | BNT162b2 VE estimates stratified by virus variant (as determined by genome sequencing) and all descriptive analyses described above                                                                 |
| 9. To estimate the effectiveness of 2 doses of BNT162b2 (i.e., fully vaccinated) against death during hospitalization due to ARI due to SARS-CoV-2 infection | VE calculated as 1 minus the HR comparing the incidence of being fully vaccinated (2 doses) with BNT162b2 for death during hospitalization due to SARS-CoV-2 infection and not, multiplied by 100%. |

## 9. RESEARCH METHODS

### 9.1. Research Setting

Kaiser Permanente Southern California (KPSC) is a large integrated healthcare delivery system that covers more than 4.7 million members. KPSC comprises one of the largest health insurance plans in the United States (US), a hospital system, and >7,600 physicians and 27,000 nurses located throughout 9 counties of Southern California. 15 medical centers and 234 medical offices comprise the KPSC clinical care setting. Kaiser Permanente Southern California's member population is socioeconomically diverse and broadly representative of the racial/ethnic groups living in Southern California. Our population represents > 260 ethnicities and > 150 languages spoken. As of December 2018, the majority of current members are Hispanic or Latino (43%), followed by White (35%), Asian/Pacific Islander (12%), Black or African American (9%), and Other (1%). Member retention is very high, with nearly 90% staying after 1 year, 78% remaining after 3 years, and 71% remaining after 5 years. Members enroll through the Kaiser Foundation Health Plan for prepaid health care insurance, including pharmaceutical benefits, through group plans, individual plans, Medicare, Medicaid, and other low-income programs. As of December 2018, 22% of patients were enrolled through Medicare or Medi-Cal and Children's Health Insurance Program (CHIP).

Our pre-paid system is a strong incentive to receive care within KPSC and members rarely seek outside care. KPSC provides care across the entire spectrum of healthcare needs, from outpatient, inpatient, ED, urgent care, specialty care, pharmacy, imaging, laboratory, virtual care, health education classes, and other services for our members. When clinical services sought outside of our system are captured through claims reimbursement requests. Each Kaiser Permanente Southern California member is assigned a unique medical record number upon joining the health plan. This number is retained for life, irrespective of leaving and rejoining the health plan. This unique number allows for the linkage of different computer files containing clinical and administrative information. Kaiser Permanente HealthConnect<sup>®</sup>, our comprehensive electronic health record, is one of the largest private electronic health record systems in the world. Kaiser Permanente HealthConnect and our integrated model securely connect medical offices and hospitals across the region, providing members,

PFIZER CONFIDENTIAL

physicians, and other authorized health care providers with online access to clinical information. Kaiser Permanente HealthConnect is a customized version of the EPIC electronic health record.

The system integrates all aspects of care, including pharmacy and lab services, as well as appointments, registration, and billing. This information can be used for research purposes. Trained research staff have access to Kaiser Permanente HealthConnect through the Kaiser Permanente Regional Application Portal.

### Regional Laboratories

The Sherman Way Regional Reference Laboratories is a clinical laboratory management system that interfaces with Kaiser Permanente's medical centers and medical office buildings. The central reference laboratory occupies more than 150,000 square feet of laboratory space and employs more than 600 employees. Services include comprehensive chemistry, microbiology, cellular pathology, cytogenetic testing, and anatomic pathology services based on state-of-the-art instrumentation and methodologies.

The Chino Hills reference laboratory occupies more than 120,000 square feet of laboratory space and employs approximately 230 employees. Services cover specimen processing, including send-outs, auto-chemistry, endocrinology, limited special chemistry, immunology, bacteriology, molecular microbiology, and histology.

The clinical laboratories located in the local medical centers and medical offices each routinely conduct 2,000 to 3,000 laboratory tests per day. The central reference laboratory receives more than 50,000 specimens per day from the local laboratories and performs over 29 million tests annually. All laboratories undergo routine quality checks to meet or surpass accrediting body specifications.

The Regional Reference Laboratories are fully accredited by the College of American Pathologists. They are licensed by the Department of Health and Human Services Centers for Medicare and Medicaid Services under the Clinical Laboratory Improvement Amendments (CLIA) of 1988, by the State of California Department of Public Health to perform clinical assays, and by the U.S. Food and Drug Administration Bureau of Biologics. They are inspected by the American Association of Blood Banks for handling of blood components.

There is a dedicated Regional Laboratory Operations team including management and Research Associates that supports research and serves as the liaison between Research & Evaluation and the Regional Laboratory.

### COVID-19 at KPSC

As of 23 February 2021 KPSC has had over 441,000 COVID-19 cases and approximately 29,000 confirmed patients admitted to the hospital. We have vaccinated more than 311,000 individuals as of 23 February 2021.

PFIZER CONFIDENTIAL

At KPSC, diagnostic testing for SARS-CoV-2 is offered free of charge with an order from a KPSC physician. Prioritization for testing has evolved during the pandemic, with an emphasis on individuals with symptoms (particularly high-risk groups) and prior to hospital admissions or certain outpatient procedures. Testing is primarily conducted by reverse transcriptase polymerase chain reaction (RT-PCR) of nasopharyngeal/oropharyngeal swabs on the Roche cobas® 6800 and 8800 analyzers or nasal/oropharyngeal swabs on Hologic Panther® analyzers. A smaller number of Abbott IDNOW® point-of-care tests are conducted in limited settings (e.g., obstetrics, pulmonary medicine, and infectious disease departments). Testing of asymptomatic individuals is also available, leveraging e-visits to place tests orders. Implementation in November 2020 of saliva testing and a new COVID-19 laboratory with Thermo Fisher Scientific Amplitude Solution instruments has increased testing capacity to approximately 46,000 tests per day.

## 9.2. Study design

This is a database only study of existing healthcare data, no patients will be actively enrolled.

Vaccine exposure for both study designs include fully vaccinated, defined as 2 doses of BNT162b2 received with  $\geq 7$  days between receipt of the 2<sup>nd</sup> dose and the event date (e.g., admission); partially vaccinated, defined as 1 dose (only) of BNT162b2 received with  $\geq 14$  days between the receipt of the 1<sup>st</sup> dose and the event date; and ever vaccinated, defined as  $\geq 1$  dose of BNT162b2 received with  $\geq 14$  days between the receipt of the 1<sup>st</sup> dose and the event date. The unexposed group will include individuals with no record of COVID-19 vaccination at the time of the event and will serve as the reference group in all VE analyses. All data will be collected from KPSC electronic health records (EHRs).

### *Study Design(s)*

#### **Test Negative Case-Control Design**

A TND study design will be used to evaluate the primary objective of this study, to assess effectiveness of 2 doses of Pfizer COVID vaccine  $\geq 7$  days after second dose against hospitalization for ARI due to SARS-CoV-2 infection. It will include all KPSC patients 12 years or older who are admitted to the hospital with acute respiratory infection (ARI) after 14 December 2020 (date of first vaccinations at KPSC), and who receive a PCR test for SARS-CoV-2. For secondary objectives estimating VE against ED admission, the TND will include KPSC patients 12 years or older who present to the ED with acute respiratory infection (ARI) after 14 December 2020 and who receive a PCR test for SARS-CoV-2. These populations will be used to evaluate additional secondary and exploratory objectives outlined in Table 1 and Table 2 above, including VE of 1 dose or  $\geq 1$  dose and VE for important virus variants.

The index date will be defined as the date of hospitalization or ED admission. Patients can contribute more than one ARI event to the study if a subsequent ARI event for the same patient occurred  $>30$  days after the previous event.

Per KPSC clinical protocol, we expect that ED patients with ARI will be tested for COVID-19, and in the inpatient setting, all patients with or without ARI will get tested for COVID-19 (to be confirmed with preliminary data). VE will be estimated separately for prevention of hospitalization (primary outcome) and for prevention of emergency department presentation without hospitalization (secondary outcome).

### **Full Cohort Design**

A full cohort design will be used for secondary objectives to further explore BNT162b2 VE in the KPSC population. The cohort study will include all KPSC members as of 14 December 2020 (date of first Pfizer vaccination at KPSC) who are age 12 and older. The exposure will be receipt of Pfizer's COVID-19 vaccine, with separate relative VEs estimated for those with 2 doses, 1 dose, or  $\geq 1$  dose as in the TND design above. In this full cohort design, a patient's vaccination status, and thus exposure, will change over time, with all patients entering the cohort as unvaccinated. The outcomes of interest will be COVID-19 associated hospitalization, ED admission, ICU admission, death, and outpatient COVID-19 diagnoses (without subsequent hospitalization within 14 days). As with the TND, the main outcome of interest will be hospitalization, and the VE of focus will be 2 doses of BNT162b2. The full cohort analysis will serve as a secondary analysis and will allow for comparability with TND study methodology. Cohort members will be censored if they disenroll from KPSC, die for reasons not related to COVID-19 (death not within the 30 days following a positive COVID-19 laboratory test), receive any other newly licensed or investigational COVID-19 vaccine or prophylactic agent other than Pfizer's COVID-19 vaccine, receive  $>2$  Pfizer COVID-19 vaccine doses, experience an outcome  $<14$  days after receipt of the 1<sup>st</sup> Pfizer COVID-19 dose, or experience an outcome  $<7$  days after receipt of the 2<sup>nd</sup> Pfizer COVID-19 dose.

### **9.2.1. Inclusion criteria**

Patients must meet all of the following inclusion criteria to be eligible for inclusion in the study:

#### **Test Negative Design**

1. KPSC patients 12 years or older who are admitted to the hospital (primary objective) with acute respiratory infection (ARI; ICD codes listed in [Appendix Table 1](#)) after 14 December 2020 (date of first vaccinations at KPSC), and who receive a PCR test for SARS-CoV-2.
2. For secondary objectives estimating VE against ED admission, the TND will include KPSC patients 12 years or older who present to the ED with ARI after 14 December 2020, and who receive a PCR test for SARS-CoV-2.
3. We will include membership requirement of 6 months prior to index date, which is defined as the date of hospitalization or ED admission (allowing 31-day administrative gap), to facilitate accurate capture of comorbid conditions.

#### **Cohort Design**

1. All KPSC members as of 14 December 2020 (date of first Pfizer vaccination at KPSC) who are age 12 and older.
2. For the cohort study, patients must have at least 6 months of membership (allowing 31-day administrative gap) prior to 14 December 2020 (index date, date vaccinations first began at KPSC) to facilitate accurate capture of comorbid conditions.

### **9.2.2. Exclusion criteria**

Patients meeting any of the following criteria will not be included in the study:

#### **Test Negative Design**

Patients who receive any other newly licensed or investigational SARS-CoV-2 vaccine or COVID-19 prophylactic agent other than Pfizer's COVID-19 vaccine prior to hospitalization (or ED, for secondary objective) will be excluded from the analysis. Patients will also be excluded if the index date is within certain time windows from vaccination date, outlined further in the exposure section below.

#### **Cohort Design**

There will be no exclusion criteria for the cohort design, however patients will be censored for receiving any other newly licensed or investigational SARS-CoV-2 vaccine or COVID-19 prophylactic agent other than Pfizer's COVID-19 vaccine. Patients will also be censored



if the event (hospitalization, ED encounter, etc.) occurs within certain time windows from vaccination date, outlined further in the exposure section below.

### 9.3. Variables

#### 9.3.1. Test Negative Design Outcomes and Exposures

Cases: Cases will be defined as those with any positive KPSC laboratory-confirmed PCR test from a sample collected within 14 days prior to hospital admission through 3 days after a hospital admission (primary objective) or ED encounter (secondary objective) with an ARI code ([Appendix Table 1](#)).

Controls: Controls will be defined as those with laboratory confirmed negative COVID-19 (negative COVID-19 test during first 3 days of hospitalization for primary objective or ED admission for secondary objective and no positive COVID-19 tests within 30 days prior to encounter).

Exposure Definition: The exposure of interest is history of vaccination with BNT162b2. For the primary objective, patients will be considered vaccinated if they have documented evidence of receiving the second dose of BNT162b2  $\geq 7$  days before index date (i.e., defined as the date of hospitalization or ED admission). When evaluating the effectiveness of 1 dose of BNT162b2, patients will be considered vaccinated if they have documented evidence of receiving the first dose of BNT162b2  $\geq 14$  days before index date. Four levels of exposure variable will be assessed:

1. **Fully vaccinated** defined as 2 doses of BNT162b2 received with  $\geq 7$  days between receipt of the 2<sup>nd</sup> dose and the index date. This group will serve as the ‘exposed’ group evaluated in the primary objective. Patients who received only 1 dose or 2 doses of BNT162b2 with  $< 7$  days between receipt of the 2<sup>nd</sup> dose and the index date will be excluded from analysis. In sensitivity analyses, VE will also be calculated for 2 doses of BNT162b2 received with  $\geq 14$  days between receipt of the 2<sup>nd</sup> dose and the index date.
2. **Partially vaccinated** defined as 1 dose (only) of BNT162b2 received with  $\geq 14$  days between receipt of the 1<sup>st</sup> dose and the index date. This group will serve as the ‘exposed’ group as a secondary endpoint. Patients who received 2 doses or 1 dose of BNT162b2 with  $< 14$  days between receipt of the 1<sup>st</sup> dose and the index date will be excluded from analysis.
3. **Ever vaccinated** defined as  $\geq 1$  dose of BNT162b2 received with  $\geq 14$  days between index date and receipt of the 1<sup>st</sup> dose. Patients who received 1 dose of BNT162b2 received with  $< 14$  days between receipt of the 1<sup>st</sup> dose and the index date will be excluded from analysis.
4. **Never vaccinated** defined as never received BNT162b2. This group will serve as the reference exposure group (i.e., ‘unexposed’ group) in all VE analyses.

The fully vaccinated (2 dose) exposure group will be considered for the primary objective, while the partially (1 dose) and ever vaccinated ( $\geq 1$  dose) groups will be considered in secondary objectives.

### **9.3.2. Full Cohort Design Outcome and Exposures**

#### Main outcome

The main outcome of interest will be COVID-19 hospitalization, which will be defined as a hospitalization with a positive PCR SARS-CoV-2 test within 14 days prior and 3 days after admission date.

#### Other outcomes of interest

COVID-19 ICU will be defined as time spent in an intensive care/critical care unit during a hospital stay with COVID-19 admit as defined above.

COVID-19 ED encounter, which will be defined as an ED encounter with a positive PCR SARS-CoV-2 test within 14 days prior and 3 days after encounter.

COVID-19 death will be defined as death within the 30 days following a positive COVID-19 laboratory test. Due to lags in compiling cause of death data in our databases, we will not have cause of death data in time for the study.

Death during hospitalization will also be assessed.

Laboratory-confirmed SARS-CoV-2 infection identified in the outpatient setting, without a hospitalization in the subsequent 14 days.

Exposures of interest: The exposure will be receipt of Pfizer's COVID-19 vaccine, with separate relative VEs estimated for those fully (2 dose), partially (1 dose), or ever vaccinated ( $\geq 1$  dose) as in the TND design above. In this full cohort design, a patient's vaccination status, and thus exposure, will change over time, so VE will be estimated using time-varying exposures, explained in further detail below.

Partially and Fully Vaccinated: Partial (1 dose) and full (2 dose) vaccination VE will be estimated using time-varying exposures, with patients initially entering the cohort as unvaccinated, then contributing person time to the partial and fully vaccinated exposure groups as they are receiving the vaccine over time in the real-world setting. Specifically, a patient will move to the 1-dose exposure group once 14-days have passed following the first dose, and then to the 2-dose exposure group once 7-days have passed following the second dose. If a patient experiences an event within 14 days of the first dose, or 7 days within the second dose, he or she will be censored at that time. No requirements on the timing between doses will be applied.

To explore VE durability after 2 doses, secondary models will further refine the exposure categories to include time since receipt of dose 2. As in the main analysis, patients will still

PFIZER CONFIDENTIAL

enter the cohort as unvaccinated on 14 December 2020 (date of first vaccinations at KPSC) and will move from unexposed to the partial and full vaccinated exposure groups as they are vaccinated over time. Once the second dose is received, we will then code exposure categories as, for example, 1-29 days, 30-89 days, 90-180 days, 180-364, and  $\geq 365$  days since receipt of dose 2. Each patient will contribute person time to these groups as the allotted amount of time passes since their second dose. This will allow us to analyze the relative VE during those different time periods and explore VE durability. If sample size allows, we will conduct a similar analysis looking at only 1 dose, where patients will be censored from the analyses when they receive their second dose. To inform our decisions in choice of cut points for both dose models, we will also estimate changes in relative VE continuously over time by modeling time since vaccination using restricted cubic splines.

Ever Vaccinated: Relative VE for the Ever Vaccinated ( $\geq 1$  dose) group will be estimated in a separate analysis also using time varying exposures. Patients will again enter the cohort as unvaccinated, then contributing person time to the ever-vaccinated group after receiving dose 1. They will remain in this exposure group regardless of receipt of the 2<sup>nd</sup> dose of the Pfizer COVID-19 vaccine.

Unexposed: Individuals with no record of BNT162b2 COVID-19 vaccination.

### **9.3.3. Test-Negative and Full Cohort Designs – Outside Vaccinations**

To obtain information about vaccination that occurs outside of the KPSC healthcare system, we will also take advantage of the recent partnership KPSC established with 7 national pharmacy chains as well as data exchange with the California Immunization Registry (CAIR). This partnership allows for KPSC members to receive influenza and other vaccines outside of KPSC pharmacies. Starting 30 December 2020, a bidirectional data exchange was established with CAIR, thereby allowing us to capture vaccinations received outside of KPSC. CAIR bidirectionality brings together a partnership between electronic medical records, the public health department, and pharmacies. Doses administered outside of KPSC are currently being recorded in the electronic health record as, for example, “Covid-19 vaccine, Pfizer, external administration.”

One exception to this is that immunization data for San Diego patients is reported into the San Diego Immunization Registry (SDIR), not CAIR. Because SDIR does not currently provide data to CAIR, complete immunization information for San Diego patients is not yet available via KP HealthConnect. However, providers can do a manual query in SDIR to update member immunization records.

In California, COVID-19 vaccination providers are required to report COVID-19 doses administered within 24 hours of administration to their local immunization registry.

To verify our exposure data, we propose a validation study nested in the larger cohort study to survey a random sample of patients in the ‘non-vaccinated’ population to confirm data capture in the KPSC EHR (separate protocol).

PFIZER CONFIDENTIAL

### 9.3.4. Test-Negative and Full Cohort Designs - Covariates

We will consider individual-level and neighborhood-level factors listed in the Table 3 below. These are factors that we have either found to be important covariates in previous work, have been identified in other risk factor literature, or are variables that may be associated with the exposure as well as outcome (i.e. prior positive SARS-CoV-2 PCR test, etc.)<sup>3-8</sup>. We will also include calendar week as a covariate in our models to adjust for phase in vaccine rollout, testing practice changes, social distancing impacts, surges, and potential changes in clinical treatments.

**Table 3. Factors to be considered in models**

| Demographics   | Comorbidities                                | Care utilization prior to test | Neighborhood characteristics   | COVID- history                | Individual risk indicators            |
|----------------|----------------------------------------------|--------------------------------|--------------------------------|-------------------------------|---------------------------------------|
| Age            | Cardiac disease                              | Outpatient encounters          | Population density             | Prior negative PCR tests      | Health care worker (HCW) / occupation |
| Sex            | Organ transplant                             | Inpatient encounters           | Median income                  | Prior positive PCR tests      | Long-term care resident               |
| Race/ethnicity | Diabetes with A1C                            | ED encounters                  | Neighborhood deprivation index | Prior negative serology tests | Medical Center                        |
|                | Chronic Obstructive Pulmonary Disease (COPD) | Influenza vaccination          | Education                      | Prior positive serology tests |                                       |
|                | Renal disease                                | Pneumococcal vaccination       |                                |                               |                                       |
|                | Body mass index (BMI)                        |                                |                                |                               |                                       |
|                | Malignancy                                   |                                |                                |                               |                                       |
|                | Hypertension                                 |                                |                                |                               |                                       |
|                | Charlson Index                               |                                |                                |                               |                                       |
|                | Sedentary vs. Active                         |                                |                                |                               |                                       |

### 9.4. Data sources

All data will be collected from KPSC electronic health records. This is a database analysis study of existing healthcare data; no patients will be actively enrolled. We will collect data including vaccination status and dates of vaccination, COVID-19 testing and outcomes, comorbidities, prior healthcare utilization, other vaccinations, demographic data, and other data from the EHR.

All data for research are subjected to a number of quality checks. The programming teams perform range and consistency checks for all data to be evaluated. These might include event dates after death, procedures coded at facilities that don't perform them, outlying laboratory values, and other evaluations. All study data are presented in team meetings on at least a weekly basis and further examinations for potential errors are made by the scientists and biostatisticians. In addition, at both sites there are a number of standard algorithms in place that will be used to further subject the data to quality control procedures. Aberrant data will be examined to determine if they are due to programming errors, and efforts to resolve systematic problems that lead to errors will occur as soon as possible after they are discovered and will continue until resolution. These quality control procedures will be documented, providing an auditable trail.

Once all necessary data from KPSC have been pulled and have undergone robust quality control measures, the databases will be frozen and archival copies of each separate dataset will be made. Continuous data quality assurance and improvement are a top priority. The team will be prompt in responding to any data quality inquiries from Pfizer if and when any issues are discovered.

All programming and analyses will be conducted using SAS statistical software, version 9.4 (Cary, NC), and R (R Core Team 2019, version 3.6.0).

## 9.5. Study size

The TND analysis will be event-driven based on the number of cases identified. Study sample size is based on the primary endpoint (BNT162b2 VE against ARI requiring hospitalization where SARS-CoV-2 is identified in the TND study). The required sample size will depend primarily on i) the proportion of all-cause ARI requiring hospitalization caused by SARS-CoV-2 (which determines the number of cases identified and the ratio of cases to controls in the primary analysis), ii) the average uptake of BNT162b2 in the study population over the duration of the study, and iii) the assumed VE of the specific COVID-19 vaccine against ARI requiring hospitalization where SARS-CoV-2 is identified. Sample size calculations were based on the following fixed assumptions:

Two-sided, type-I error of 5%

1. 90% power
2. Log(OR) following approximated normal distribution
3. Assumed true BNT162b2 VE varying from 70–90% to prevent ARI requiring hospitalization was modeled
4. 5% of all-cause ARI episodes requiring hospitalization will test positive for SARS-CoV-2. A range of 5–30% was also modeled given the attack rate of COVID-19 may vary based on social distancing and shelter-in-place measures, underlying levels of population immunity, and other factors.

PFIZER CONFIDENTIAL

Average BNT162b2 vaccine uptake in controls over the study period was allowed to vary in sample size calculations (range: 10–90%) and will depend on potential future vaccination uptake scenarios and timing of the conduct of the study. Final study enrollment size will also depend on the proportion of enrolled patients excluded from the Per Protocol Population because i) vaccination records could not be obtained, ii) they received a newly-licensed or investigational SARS-CoV-2 vaccine other than BNT162b2 vaccine, or iii) they received BNT162b2 vaccine, but did not receive the full 2-dose schedule.

Table 4 presents sample size calculations for various scenarios of BNT162b2 uptake and the proportion of all-cause ARI where SARS-CoV-2 is identified. Depending on the uptake of BNT162b2 and the proportion of ARI hospitalizations where SARS-CoV-2 is identified at the time of the study, approximately 3,000 to 12,000 persons  $\geq 12$  years of age will be needed in the TND analysis. Our study team will monitor BNT162b2 uptake among controls and the proportion of all-cause ARI where SARS-CoV-2 is identified to inform decisions on the sample size required to reach an effectiveness endpoint.

For the cohort design, analysis will be performed at fixed time points after a specified duration of follow-up. Power to detect a given hazard ratio in a Cox model depends primarily on the number of events observed during follow-up, but also varies with the degree of correlation between the exposure of interest (vaccination) and the other covariates in the model. Given that exposure at any given time may be highly correlated with age or comorbidities, we allowed the correlation ( $r^2$ ) to vary from 0.1 to 0.5, while estimating a VE (1-HR) ranging from 30% to 90%. The power table below shows the total number of events which would need to be observed in the cohort to have 90% power at alpha level 0.05 to detect a given VE at a given correlation between vaccine exposure and other covariates.

**Table 4. Total number of events needed to provide 90% power to detect a given VE**

| VE (1-HR) | Correlation of vaccine exposure with other covariates |     |     |
|-----------|-------------------------------------------------------|-----|-----|
|           | 0.1                                                   | 0.3 | 0.5 |
| 90%       | 4                                                     | 5   | 7   |
| 70%       | 13                                                    | 17  | 23  |
| 50%       | 38                                                    | 49  | 69  |
| 30%       | 144                                                   | 185 | 259 |

Requirements for the final analysis population to detect BNT162b2 VE >20% assuming true VE=70–90% with 90% power and type-I error of 5% (2-sided) under various BNT162b2 uptake scenarios (5 to 30% of ARI events requiring hospitalization due to SARS-CoV-2)

**Table 5. COVID VE Sample Size**

|                           | 5% of ARI is SARS-CoV-2 positive |        |          |              | 15% of ARI is SARS-CoV-2 positive |        |          |              | 25% of ARI is SARS-CoV-2 positive |        |          |              | 30% of ARI is SARS-CoV-2 positive |        |          |              |
|---------------------------|----------------------------------|--------|----------|--------------|-----------------------------------|--------|----------|--------------|-----------------------------------|--------|----------|--------------|-----------------------------------|--------|----------|--------------|
| <b>Assume true VE=70%</b> |                                  |        |          |              |                                   |        |          |              |                                   |        |          |              |                                   |        |          |              |
| BNT162 Uptake             | Con-trols                        | case s | Tot Eval | Tot En-roll* | Con-trols                         | case s | Tot Eval | Tot En-roll* | Con-trols                         | case s | Tot Eval | Tot En-roll* | Con-trols                         | case s | Tot Eval | Tot En-roll* |
| 10                        | 6769                             | 356    | 7125     | 11875        | 2104                              | 371    | 2475     | 4125         | 1171                              | 390    | 1561     | 2602         | 938                               | 402    | 1340     | 2233         |
| 20                        | 3266                             | 172    | 3438     | 5730         | 1022                              | 180    | 1202     | 2003         | 573                               | 191    | 764      | 1273         | 461                               | 198    | 659      | 1098         |
| 30                        | 2108                             | 111    | 2219     | 3698         | 665                               | 117    | 782      | 1303         | 377                               | 126    | 503      | 838          | 304                               | 130    | 434      | 723          |
| 40                        | 1540                             | 81     | 1621     | 2702         | 491                               | 87     | 578      | 963          | 281                               | 94     | 375      | 625          | 229                               | 98     | 327      | 545          |
| 50                        | 1213                             | 64     | 1277     | 2128         | 392                               | 69     | 461      | 768          | 228                               | 76     | 304      | 507          | 187                               | 80     | 267      | 445          |
| 60                        | 1015                             | 53     | 1068     | 1780         | 335                               | 59     | 394      | 657          | 199                               | 66     | 265      | 442          | 165                               | 71     | 236      | 393          |
| 70                        | 909                              | 48     | 957      | 1595         | 308                               | 54     | 362      | 603          | 187                               | 62     | 249      | 415          | 157                               | 67     | 224      | 373          |
| 80                        | 905                              | 48     | 953      | 1588         | 318                               | 56     | 374      | 623          | 200                               | 67     | 267      | 445          | 171                               | 73     | 244      | 407          |
| 90                        | 1174                             | 62     | 1236     | 2060         | 435                               | 77     | 512      | 853          | 287                               | 96     | 383      | 638          | 251                               | 108    | 359      | 598          |
| <b>Assume true VE=80%</b> |                                  |        |          |              |                                   |        |          |              |                                   |        |          |              |                                   |        |          |              |
| BNT162 Uptake             | Con-trols                        | case s | Tot Eval | Tot En-roll* | Con-trols                         | case s | Tot Eval | Tot En-roll* | Con-trols                         | case s | Tot Eval | Tot En-roll* | Con-trols                         | case s | Tot Eval | Tot En-roll* |
| 10                        | 4945                             | 260    | 5205     | 8675         | 1518                              | 268    | 1786     | 2977         | 832                               | 277    | 1109     | 1848         | 661                               | 283    | 944      | 1573         |
| 20                        | 2325                             | 122    | 2447     | 4078         | 717                               | 127    | 844      | 1407         | 396                               | 132    | 528      | 880          | 315                               | 135    | 450      | 750          |
| 30                        | 1455                             | 77     | 1532     | 2553         | 452                               | 80     | 532      | 887          | 252                               | 84     | 336      | 560          | 201                               | 86     | 287      | 478          |
| 40                        | 1024                             | 54     | 1078     | 1797         | 321                               | 57     | 378      | 630          | 181                               | 60     | 241      | 402          | 146                               | 63     | 209      | 348          |
| 50                        | 770                              | 41     | 811      | 1352         | 245                               | 43     | 288      | 480          | 140                               | 47     | 187      | 312          | 114                               | 49     | 163      | 272          |
| 60                        | 608                              | 32     | 640      | 1067         | 197                               | 35     | 232      | 387          | 115                               | 38     | 153      | 255          | 95                                | 41     | 136      | 227          |
| 70                        | 505                              | 27     | 532      | 887          | 169                               | 30     | 199      | 332          | 102                               | 34     | 136      | 227          | 85                                | 36     | 121      | 202          |
| 80                        | 455                              | 24     | 479      | 798          | 160                               | 28     | 188      | 313          | 101                               | 34     | 135      | 225          | 86                                | 37     | 123      | 205          |
| 90                        | 513                              | 27     | 540      | 900          | 196                               | 35     | 231      | 385          | 132                               | 44     | 176      | 293          | 116                               | 50     | 166      | 277          |
| <b>Assume true VE=90%</b> |                                  |        |          |              |                                   |        |          |              |                                   |        |          |              |                                   |        |          |              |

PFIZER CONFIDENTIAL

CT24-WI-GL02-RF02 2.0 Non-Interventional Study Protocol Template For Secondary Data Collection Study 15-Aug-2018

**Table 5. COVID VE Sample Size**

| BNT162 Uptake | 5% of ARI is SARS-CoV-2 positive |        |          |              | 15% of ARI is SARS-CoV-2 positive |        |          |              | 25% of ARI is SARS-CoV-2 positive |        |          |              | 30% of ARI is SARS-CoV-2 positive |        |          |              |
|---------------|----------------------------------|--------|----------|--------------|-----------------------------------|--------|----------|--------------|-----------------------------------|--------|----------|--------------|-----------------------------------|--------|----------|--------------|
|               | Con-trols                        | case s | Tot Eval | Tot En-roll* | Con-trols                         | case s | Tot Eval | Tot En-roll* | Con-trols                         | case s | Tot Eval | Tot En-roll* | Con-trols                         | case s | Tot Eval | Tot En-roll* |
| 10            | 4275                             | 225    | 4500     | 7500         | 1294                              | 228    | 1522     | 2537         | 698                               | 233    | 931      | 1552         | 549                               | 235    | 784      | 1307         |
| 20            | 1955                             | 103    | 2058     | 3430         | 594                               | 105    | 699      | 1165         | 322                               | 107    | 429      | 715          | 253                               | 108    | 361      | 602          |
| 30            | 1183                             | 62     | 1245     | 2075         | 361                               | 64     | 425      | 708          | 197                               | 66     | 263      | 438          | 155                               | 66     | 221      | 368          |
| 40            | 798                              | 42     | 840      | 1400         | 245                               | 43     | 288      | 480          | 135                               | 45     | 180      | 300          | 107                               | 46     | 153      | 255          |
| 50            | 568                              | 30     | 598      | 997          | 176                               | 31     | 207      | 345          | 98                                | 33     | 131      | 218          | 78                                | 33     | 111      | 185          |
| 60            | 417                              | 22     | 439      | 732          | 132                               | 23     | 155      | 258          | 74                                | 25     | 99       | 165          | 60                                | 26     | 86       | 143          |
| 70            | 313                              | 16     | 329      | 548          | 101                               | 18     | 119      | 198          | 59                                | 20     | 79       | 132          | 49                                | 21     | 70       | 117          |
| 80            | 241                              | 13     | 254      | 423          | 83                                | 15     | 98       | 163          | 51                                | 17     | 68       | 113          | 43                                | 18     | 61       | 102          |
| 90            | 212                              | 11     | 223      | 372          | 82                                | 14     | 96       | 160          | 56                                | 19     | 75       | 125          | 50                                | 21     | 71       | 118          |

\*Assumes 40% of enrolled participants will be unevaluable (i.e., excluded from the Per Protocol Population because i) vaccination records could not be obtained, ii) they received a newly-licensed or investigational SARS-CoV-2 vaccine other than COVID-19 vaccine, or iii) they received COVID-19 vaccine, but did not receive the full 2-dose schedule.



## **9.6. Data management**

Data management activities include system operation and maintenance, security, data specification, programming, systems and data validation, sequencing of operational steps and events, quality assurance / quality control, and data backup.

The study team will hold weekly internal meetings with a primary goal surrounding quality assurance. The meetings will be a platform for the programmers and analysts to report their work in progress to the scientist team and to discuss any potential issues. KPSC will maintain internal data management logs to track data management activities and important communication with internal personnel or Pfizer.

In general, we will rely on our internal team meetings to manage tasks. Internal review processes and team meetings will be used to monitor performance. Meeting minutes, meeting agendas, progress reports, meetings, e-mail, and calendar tools will be used to manage and ensure quality of the project. We will use internal team meetings, e-mail, conference calls, the website, and progress reports to communicate. We will develop a document in coordination with the sponsor that will list all deliverables and expected timelines for deliverables. Tracking of project deliverables will be a standing item on meeting agendas.

Any problems or risks will be brought up at our regular internal team meetings and escalated to Pfizer as needed. The leadership team will discuss solutions to problems and ways to mitigate risks. We will use e-mail and our progress reports to communicate proactively with Pfizer regarding any anticipated risks or barriers to the project.

Once the study has begun, if Pfizer changes timelines or increases the scope of the objectives, we will examine all possible means to accommodate the changes within the existing budget. If not, we will work closely with Pfizer to adjust the budget, scope of work, and/or timelines.

### **9.6.1. Electronic data records**

All data will be collected from KPSC electronic health records. This is a database analysis study of existing healthcare data; no patients will be actively enrolled. Therefore, no case report forms or data collection tools will be created and submitted to Pfizer. The investigator shall ensure that the electronic data records are securely stored at the study site and will have limited access. Patient-specific data will not be transferred or reported out to Pfizer. Aggregate descriptive analyses will be presented.

### **9.6.2. Record retention**

The final database will be archived and retained in a password-protected location. To enable evaluations and/or inspections/audits from regulatory authorities or Pfizer, records, including the identity of all participating patients (sufficient information to link records, e.g., hospital records), source documents, detailed records of treatment disposition, and adequate docu-

mentation of relevant correspondence (e.g., letters, meeting minutes, and telephone call reports) will be maintained. The records will be retained by the investigator according to site guidelines. The records will be stored securely for so long as they are retained.

If the investigator becomes unable for any reason to continue to retain study records for the required period (e.g., retirement, relocation), Pfizer will be prospectively notified. The study records must be transferred to a designee acceptable to Pfizer, such as another investigator, another institution, or to an independent third party arranged by Pfizer.

Study records will be kept for a minimum of 15 years after completion or discontinuation of the study. The investigator will obtain Pfizer's written permission before disposing of any records, even if retention requirements have been met.

## **9.7. Data analysis**

Detailed methodology for summary and statistical analyses of data collected in this study will be documented in a Statistical Analysis Plan (SAP), which will be dated, filed and maintained by the sponsor. The SAP may modify the plans outlined in the protocol; any major modifications of primary endpoint definitions or their analyses would be reflected in a protocol amendment.

### **9.7.1. Test Negative Design Analyses**

The analyses below will be done separately for the primary population of hospitalized patients as well as the secondary population of patients with ED encounters. Patients will be included in the analyses regardless of prior COVID-19 infection status.

#### **9.7.1.1. Descriptive Analyses**

We will give the proportion of hospitalized and ED patients with ARI where SARS-CoV-2 was identified, as well as the proportion of patients who receive 0, 1, and 2 doses of BNT162b2. We will provide the average and median time between receipt of the first and second dose of BNT162b2 among patients who received 2 doses, well as between 14 December 2020 (beginning of vaccinations at KPSC) and receipt of last dose of BNT162b2. Finally, we will describe age, gender, race/ethnicity, clinical characteristics, and severity (ICU admission, ventilator, death), and other characteristics described in Table 3 above of any patients who received BNT162b2 and test positive for SARS-CoV-2.

#### **9.7.1.2. Estimated Crude (Unadjusted) VE**

Odds of having received BNT162b2 (fully, ever, and partially vaccinated) for cases and test-negative controls will be constructed and compared using ORs and 95% confidence intervals (CIs). VE will be calculated as  $1 - \text{OR}$  multiplied by 100%. Corresponding 95% CIs will be calculated using the Wald method.

### 9.7.1.3. Estimating Adjusted VE

In addition to constructing crude OR and VE estimates, logistic regression modeling to assess BNT162b2 VE after adjustment for potentially confounding factors will be performed. With the exception of variables determined to be of clinical importance, which will be included in models regardless, variables described in 8.4.4 will be entered in the logistic regression model in backward stepwise manner. Only variables that change the estimated OR for BNT162b2 by  $\geq 10\%$  (i.e., confounder) will remain in the final VE model. A 2-sided alpha of .05 will be used for logistic regression modelling. Corresponding 95% CIs will be calculated using the Wald method. A generalized estimating equations (GEE) estimator will be used with a robust sandwich variance estimator to account for clustering introduced by variables measured at the neighborhood level. In addition to results from the final model, univariate VE results will be presented for each independent variable that is assessed for potential confounding, as the results from a fully-adjusted model.

### 9.7.1.4. Sensitivity Analyses

1. It is possible that patients that present with a COVID-19-like illness or a COVID-19 diagnosis are not tested for SARS-CoV-2 within 3 days of hospital admission but are rather tested later in their hospital stay. If this were the case, we would want to expand the requirement of a COVID-19 diagnostic test beyond 3 days following admission. To investigate the possibility of late testing, we will present data on the distribution of COVID-19 tests at time since admission for those admitted for respiratory infections. If we find that a meaningful number of patients are tested  $>3$  days after hospital admission, we may include a sensitivity analysis to examine VE without time restrictions on testing following admission.
2. Use and develop Natural Language Processing (NLP) algorithm to estimate actual date of symptom onset of COVID-19 symptoms. Symptom onset will then be considered to define exposure status at the time of a qualifying event (or to censor a patient if they experience an event before 14-days after the first dose of 7-days after the second).

### 9.7.1.5. Exploratory analyses estimating VE for health care workers and other high risk populations

We know that the vaccine roll-out is following a tiered strategy, for example, with healthcare workers with direct patient contact being vaccinated first. The logic supporting tiered vaccine eligibility is based on COVID-19 risk, with highest risk populations prioritized first. To account for differing risk profiles of vaccinated individuals over time, we will account for calendar week in our model. To explore whether controlling for calendar week is sufficient to address possible biases in VE, we will explore three options:

1. Flag healthcare worker, or other sub-population status (gold standard).

This will require complete and reliable identification of healthcare worker or other sub-population status, for example, long term care facility (LTCF)-resident, in the EHR. This is the preferred approach.

Analyses will then be stratified so that both cases and controls will come from the same sub-population.

2. Explore and compare VE of models stratified by time periods.

KPSC documentation of the dates of transitions between tiers will be used to create categories of vaccine distribution by time (Healthcare works/LTCF residents only, 65+, etc.),

Using these categories, we will perform stratified analyses for each phase in the vaccine rollout and examine any differences in relative VE between time strata.

3. If, through our analyses in part 2 or as the result of additional clinical input, we determine our inability to identify patients eligible for vaccination during certain vaccination tiers will result in unobserved confounding that will materially affect the reliability of our VE estimates, we will limit VE analyses to certain time periods of interest for which we know vaccinations were restricted to a particular tier – in particular we may drop analyses focused on the time period only healthcare workers were vaccinated and focus on time periods where vaccination is more widespread.

#### Other Additional Analyses:

We will also perform the following analyses:

- Determine VE against hospitalization and ED admission (combined).
- Provide descriptive statistics and determine VE stratified by viral strains determined to be important or prevalent based on sequencing analyses.
- Determine VE of BNT162b2 against hospitalization stratified by various patient characteristics (e.g., age, sex, race/ethnicity, chronic medical conditions, pregnancy status, receipt of influenza vaccine). See Table 1 for full list of stratified analyses.
- Evaluate the effectiveness of BNT162b2 against severe hospitalization-related outcomes (e.g., ICU admission, mechanical ventilation, and death).
- Compare COVID-19 disease severity between vaccinated and unvaccinated cases.

We may also consider the impact of co-infections on analyses. It is possible that agents other than SARS-CoV-2 are the primary drivers causing ARI symptoms, while SARS-CoV-2 plays a less acute role. We may explore this possibility with descriptive analyses of the distribution of COVID-19 cases with diagnostic tests for other pathogens, and a sub-analysis excluding

PFIZER CONFIDENTIAL

all patients with co-infecting respiratory (influenza or Respiratory Syncytial Virus [RSV]) pathogens.

### **9.7.2. Full Cohort Design Analyses**

As in the TND, we will include those with and without prior COVID-19 diagnoses.

#### **9.7.2.1. Descriptive Analyses**

We will give the proportion of patients who receive 0, 1, and 2 doses of BNT162b2 across all of KPSC during the study period. We will provide the average and median time between receipt of the first and second dose of BNT162b2 among patients who received 2 doses, as well as between 14 December 2020 (index date for cohort study, beginning of vaccinations at KPSC) and receipt of last dose of BNT162b2. Overall incidence of the outcomes of interest will be calculated by dividing the number of outcome cases by the total number of person-years. We will also provide incidence estimates by age, gender, race/ethnicity, clinical characteristics, and other characteristics described in Table 2 and Table 3 above. We will additionally explore changes in the clinical and demographic composition of the vaccinated and non-vaccinated population over time, as this will also change with vaccine phase integration. Characteristics of those who test positive for COVID-19 and those without COVID-19 will be presented.

#### **9.7.2.2. Estimated Crude (Unadjusted) VE**

VE will be estimated as  $1 - [(\text{incidence of outcome among vaccine recipients}) / (\text{incidence of outcome among unvaccinated})]$ . The incidence rate ratio will be estimated using the hazard ratio from the adjusted the Cox model, resulting in estimated  $VE = (1 - \text{adjusted HR}) * 100\%$ . Corresponding 95% CIs will be calculated. Vaccination status will be time-varying as described previously in the Exposures section.

#### **9.7.2.3. Estimating Adjusted VE**

Adjusted hazard ratios (HRs) and 95% CIs will be estimated by including age, sex, race, and other covariates listed in Table 3 in Cox proportional hazards regression models. Covariates of clinical importance will be selected for the adjusted analyses. To determine whether the remaining covariates should be included in the final model, only variables that change the estimated HR for BNT162b2 by  $\geq 10\%$  (i.e., confounder) will remain in the final VE model. We will control for calendar week in all models. Robust variance will be computed to account for clustering introduced by neighborhood level variables. Vaccine effectiveness (VE) will be estimated as  $1 - [(\text{incidence of outcome among vaccine recipients}) / (\text{incidence of outcome among unvaccinated})]$ . The incidence rate ratio will be estimated using the hazard ratio from the adjusted the Cox model, resulting in estimated  $VE = (1 - \text{adjusted HR}) * 100\%$ .

#### **9.7.2.4. Sensitivity Analyses**

Use and develop NLP algorithm to estimate actual date of symptom onset of COVID-19 symptoms. Symptom onset will then be considered to define exposure status at the time of a

qualifying event (or to censor a patient if they experience an event before 14-days after the first dose of 7-days after the second).

### **9.7.2.5. Exploratory analyses estimating VE for health care workers and other high risk populations**

We know that the vaccine roll-out is following a tiered strategy, for example, with healthcare workers with direct patient contact being vaccinated first. The logic supporting tiered vaccine eligibility is based on COVID-19 risk, with highest risk populations prioritized first. To account for differing risk profiles of vaccinated individuals over time, we will account for calendar week in our model. To explore whether controlling for calendar week is sufficient to address possible biases in VE, we will explore three options:

- Flag healthcare worker, or other sub-population status (gold standard).
  - This will require complete and reliable identification of healthcare worker or other sub-population status, for example, LTCF resident, in the EHR. This is the preferred approach.
  - We will then include an interaction term with healthcare worker and HRs used to estimate VE, to determine if VE is meaningfully different by these categories.
- Explore and compare VE of models by time periods.
  - KPSC documentation of the dates of transitions between tiers will be used to create categories of vaccine distribution by time (Healthcare works/LTCF residents only, 65+, etc.),
  - Using these categories, we will perform stratified analyses for each phase in the vaccine rollout and examine any differences in relative VE between time strata.
- If, through our analyses in part 2 or as the result of additional clinical input, we determine our inability to identify patients eligible for vaccination during certain vaccination tiers will result in unobserved confounding that will materially affect the reliability of our VE estimates, we will limit VE analyses to certain time periods of interest for which we know vaccinations were restricted to a particular tier – in particular we may drop analyses focused on the time period only healthcare workers were vaccinated and focus on time periods where vaccination is more widespread.

### **9.7.3. Additional Analytic Elements for Test Negative and Full Cohort Design**

#### Other Analyses for Both Designs:

- For cohort design, provide descriptive statistics and determine VE stratified by viral strains determined to be important or prevalent based on sequencing analyses.

PFIZER CONFIDENTIAL

- Determine VE of BNT162b2 stratified by various patient characteristics (e.g., age, sex, chronic medical conditions, receipt of influenza vaccine). Table 2 has the full list of proposed stratified analyses.

### Laboratory Identification of Viral Strains

Residual nasopharyngeal or other respiratory specimens tested for COVID-19 as part of standard of care (SOC), will be collected daily from the two regional laboratories that serve the KPSC population. Specimens will be saved prior to being discarded for destruction. Swabs will be retained at the study site frozen until such time as they are selected and sent for variant determination which may include PCR and/or whole genome sequencing (WGS). WGS will occur for variants of interest, to identify circulating variants, and to assess VE against specific viral strains.

### Missing or Incomplete Data:

Based on extensive prior experience, we expect negligible or no missing data for demographics, comorbidities, utilization, neighborhood characteristics (assessed through residential address data), COVID history, or societal-level factors. It is possible, however, that we will have missing data for occupation and LTCF variables. Regardless of missingness, we will present counts and percentages of missing data for all variables. If we find that data for variables included in the final models are highly complete, we will proceed with complete case analyses. If there is a substantial amount of missing data (>10%) for any variables deemed necessary to include in our final analyses, sensitivity analysis will be performed using multiple imputation for missing covariates (under the assumption of missing at random) to understand the impact of excluding patients with missing information in adjusted models.

### **Analysis Timings:**

Prior to a final analysis, periodic interim analyses may be undertaken to understand attributes of emerging variants, to assess preliminary VE to respond to public health needs or to gauge sample size. Due to the observational nature of the study, no alpha adjustment will be applied. Any interim analyses will be described in the SAP.

## **9.8. Quality control**

### Data Quality Checks

Range checks and general frequency tables will be produced such that missing values, outliers, and inappropriate or abnormal values will be identified. Comparisons between date of birth, date of death, event dates and vaccination dates will be made. All data will be checked for duplicate records.

A record of data quality problems and resolutions will be kept through documented meeting minutes. All inconsistencies and/or data quality issues will be documented. Revisions will be noted in order to capture the change made, the change date, identification of the individual making the change, as well as noting any further actions to be taken to identify and/or resolve additional data quality problems of this type.

PFIZER CONFIDENTIAL

Select programming will be reviewed by a second programmer. A report will be created, listing discrepancies, their causes, and any action taken to resolve them. If there are discrepancies due to a difference in the date on which the original and validation programs are run, both programs may be run again on the same date as a means to eliminate this potential cause of discrepancies.

### Confidentiality of Data

Any research data containing subject protected health information (PHI) is confidential. KPSC staff will not discuss research data with anyone other than KPSC personnel. Pfizer will only have access to aggregate data; no PHI will be shared with Pfizer.

### **9.9. Limitations of the research methods**

If essentially all vaccine recipients receive two doses, we would be limited to studying the effect of 1 dose only during the time between doses, which could result in insufficient power to analyze the effectiveness of 1 dose. The ability to do certain stratified analyses listed above will also be limited by sample size and outcome rates in each of these groups.

Given the vaccine rollout to high-risk groups first and lower-risk groups later, the group who receives the vaccine initially may be significantly different from the comparison population. In particular, HCW vaccinated during this period would primarily be compared to non-HCW. While the rate of infection in HCW is largely driven by the rate of infection in the community 1, this discrepancy could result in a biased estimate. Any bias caused by HCW being higher risk than the general population will tend to bias the estimate toward lower VE. We will report E-values to quantify the impact of unmeasured confounding factors. The E-value is defined as the minimum strength of association on the risk ratio scale that an unmeasured confounder would need to have with both the exposure and the outcome, conditional on the measured covariates, to fully explain away a specific exposure-outcome association. We will compare the E-value with covariate–outcome associations measured in concurrent literature (if available) that may have had data on HCW, employment status, or other unmeasured confounders and additionally compare the E-value with covariate–outcome associations among our measured covariates to determine if any association is likely to reach its magnitude. If we find it is not possible to overcome bias in early vaccine recipients using the TND or full cohort approach, we will exclude the early time period from analysis and begin the cohort at the time that a greater portion of the general public is able to receive the vaccine, resulting in a cohort start date when later batches of Pfizer vaccine are available.

### **9.10. Other aspects**

Not applicable.



## **10. PROTECTION OF HUMAN SUBJECTS**

### **10.1. Patient information**

All parties will comply with all applicable laws, including laws regarding the implementation of organizational and technical measures to ensure protection of patient personal data. Such measures will include omitting patient names or other directly identifiable data (PHI) in any reports, publications, or other disclosures, except where required by applicable laws.

The personal data will be stored at the study site in encrypted electronic form and will be password protected to ensure that only authorized study staff have access. The study site will implement appropriate technical and organizational measures to ensure that the personal data can be recovered in the event of disaster. In the event of a potential personal data breach, the study site shall be responsible for determining whether a personal data breach has in fact occurred and, if so, providing breach notifications as required by site and or/law.

To protect the rights and freedoms of natural persons with regard to the processing of personal data, , when study data are compiled for transfer to Pfizer and other authorized parties, patient names will be removed and will be replaced by a single, specific, numerical code, based on a numbering system defined by Pfizer. All other identifiable data transferred to Pfizer or other authorized parties will be identified by this single, patient-specific code. The investigator site will maintain a confidential list of patients who participated in the study, linking each patient's numerical code to his or her actual identity. In case of data transfer, Pfizer will maintain high standards of confidentiality and protection of patients' personal data consistent with the clinical study agreement and applicable privacy laws.

### **10.2. Patient consent**

This is an observational database analysis study of existing healthcare data; no patients will be actively enrolled. As this study does not involve data subject to privacy laws according to applicable legal requirements, obtaining informed consent from patients by Pfizer is not required. The site will obtain a waiver for obtaining informed consent from the KPSC IRB.

### **10.3. Institutional Review Board (IRB)/Independent Ethics Committee (IEC)**

There must be prospective approval of the study protocol, protocol amendments, and other relevant documents (e.g., informed consent forms if applicable or appropriate waiver for consent) from the relevant IRBs/IECs. All correspondence with the IRB/IEC must be retained. Copies of IRB/IEC approvals must be forwarded to Pfizer.

### **10.4. Ethical conduct of the study**

The study will be conducted in accordance with legal and regulatory requirements, as well as with scientific purpose, value and rigor and follow generally accepted research practices.

## **11. MANAGEMENT AND REPORTING OF ADVERSE EVENTS/ADVERSE REACTIONS**

This study involves electronic health record data that exist as structured data by the time of study start or a combination of existing structured data and unstructured data, which will be converted to structured form during the implementation of the protocol solely by a computer using automated/algorithmic methods, such as natural language processing.

In these data sources, individual patient data are not retrieved or validated, and it is not possible to link (i.e., identify a potential association between) a particular product and medical event for any individual. Thus, the minimum criteria for reporting an adverse event (AE) (i.e., identifiable patient, identifiable reporter, a suspect product, and event) cannot be met.

## **12. PLANS FOR DISSEMINATING AND COMMUNICATING STUDY RESULTS**

The Investigator will have primary responsibility for the expedient preparation, review and submission of any manuscripts, abstracts, press releases or other publications detailing the study's procedures or findings. The study team will follow the International Committee of Medical Journal Editors (ICMJE) criteria to determine authors, and all authors who meet these criteria will be offered authorship. We anticipate that as a collaborative project, members of each of the study organizations (KPSC and Pfizer) will participate. Each organization will determine members that meet authorship criteria. Any publication will include a list of investigators, with authors being determined in line with the ICMJE guidelines, as well as an acknowledgement of roles of the study Sponsor and Funder(s).

In the event of any prohibition or restriction imposed (e.g., clinical hold) by an applicable competent authority in any area of the world, or if the investigator is aware of any new information which might influence the evaluation of the benefits and risks of a Pfizer product, Pfizer should be informed immediately.

### 13. REFERENCES

1. Walsh EE, Frenck RW, Jr., Falsey AR, et al. Safety and Immunogenicity of Two RNA-Based Covid-19 Vaccine Candidates. *N Engl J Med.* 2020;383(25):2439-2450.
2. Polack FP, Thomas SJ, Kitchin N, et al. Safety and Efficacy of the BNT162b2 mRNA Covid-19 Vaccine. *N Engl J Med.* 2020;383(27):2603-2615.
3. Tartof SY, Qian L, Hong V, et al. Obesity and Mortality Among Patients Diagnosed With COVID-19: Results From an Integrated Health Care Organization. *Ann Intern Med.* 2020;173(10):773-781.
4. Zhou F, Yu T, Du R, et al. Clinical course and risk factors for mortality of adult inpatients with COVID-19 in Wuhan, China: a retrospective cohort study. *Lancet.* 2020;395(10229):1054-1062.
5. Webb Hooper M, Napoles AM, Perez-Stable EJ. COVID-19 and Racial/Ethnic Disparities. *JAMA.* 2020;323(24):2466-2467.
6. Petrilli CM, Jones SA, Yang J, et al. Factors associated with hospital admission and critical illness among 5279 people with coronavirus disease 2019 in New York City: prospective cohort study. *BMJ.* 2020;369:m1966.
7. Wu Z, McGoogan JM. Characteristics of and Important Lessons From the Coronavirus Disease 2019 (COVID-19) Outbreak in China: Summary of a Report of 72314 Cases From the Chinese Center for Disease Control and Prevention. *JAMA.* 2020;323(13):1239-1242.
8. Centers for Disease Control and Prevention. COVID-19 and People with Certain Medical Conditions. 2021; <https://www.cdc.gov/coronavirus/2019-ncov/need-extra-precautions/people-with-medical-conditions.html>. Accessed March 2, 2021.

#### 14. LIST OF TABLES

|          |                                                                               |    |
|----------|-------------------------------------------------------------------------------|----|
| Table 1. | TND Study Design Proposed Objectives .....                                    | 12 |
| Table 2. | Full Cohort Study Design Proposed Objectives .....                            | 14 |
| Table 3. | Factors to be considered in models.....                                       | 24 |
| Table 4. | Total number of events needed to provide 90% power to detect a given VE ..... | 26 |
| Table 5. | COVID VE Sample Size .....                                                    | 27 |

#### 15. LIST OF FIGURES

None

#### 16. ANNEX 1. LIST OF STAND ALONE DOCUMENTS

None

#### 17. ANNEX 2. ADDITIONAL INFORMATION

Appendix Table 1: Acute Respiratory Infection Diagnosis codes (International Classification of Diseases [ICD] codes)

| ICD-10 code | ICD-10 definition                            |
|-------------|----------------------------------------------|
| J12.0       | Adenoviral pneumonia                         |
| J12.1       | Respiratory syncytial virus pneumonia        |
| J12.2       | Parainfluenza virus pneumonia                |
| J12.81      | Pneumonia due to SARS-associated coronavirus |
| J12.3       | Human metapneumovirus pneumonia              |
| J12.89      | Other viral pneumonia                        |
| J12.9       | Viral pneumonia, unspecified                 |
| J13         | Pneumonia due to Streptococcus pneumoniae    |
| J18.1       | Lobar pneumonia, unspecified organism        |
| J15.0       | Pneumonia due to Klebsiella pneumoniae       |
| J15.1       | Pneumonia due to Pseudomonas                 |
| J14         | Pneumonia due to Hemophilus influenzae       |
| J15.4       | Pneumonia due to other streptococci          |
| J15.4       | Pneumonia due to other streptococci          |
| J15.3       | Pneumonia due to streptococcus, group B      |
| J15.4       | Pneumonia due to other streptococci          |

PFIZER CONFIDENTIAL

| <b>ICD-10 code</b> | <b>ICD-10 definition</b>                                                                                   |
|--------------------|------------------------------------------------------------------------------------------------------------|
| J15.20             | Pneumonia due to staphylococcus, unspecified                                                               |
| J15.211            | Pneumonia due to Methicillin susceptible Staphylococcus aureus                                             |
| J15.212            | Pneumonia due to Methicillin resistant Staphylococcus aureus                                               |
| J15.29             | Pneumonia due to other staphylococcus                                                                      |
| J15.8              | Pneumonia due to other specified bacteria                                                                  |
| J15.5              | Pneumonia due to Escherichia coli                                                                          |
| J15.6              | Pneumonia due to other Gram-negative bacteria                                                              |
| A48.1              | Legionnaires' disease                                                                                      |
| J15.8              | Pneumonia due to other specified bacteria                                                                  |
| J15.9              | Unspecified bacterial pneumonia                                                                            |
| J15.7              | Pneumonia due to Mycoplasma pneumoniae                                                                     |
| J16.0              | Chlamydial pneumonia                                                                                       |
| J16.8              | Pneumonia due to other specified infectious organisms                                                      |
| B25.0              | Cytomegaloviral pneumonitis                                                                                |
| A37.01             | Whooping cough due to Bordetella pertussis with pneumonia                                                  |
| A37.11             | Whooping cough due to Bordetella parapertussis with pneumonia                                              |
| A37.81             | Whooping cough due to other Bordetella species with pneumonia                                              |
| A37.91             | Whooping cough, unspecified species with pneumonia                                                         |
| A22.1              | Pulmonary anthrax                                                                                          |
| B44.0              | Invasive pulmonary aspergillosis                                                                           |
| J17                | Pneumonia in diseases classified elsewhere                                                                 |
| B77.81             | Ascariasis pneumonia                                                                                       |
| J17                | Pneumonia in diseases classified elsewhere                                                                 |
| J18.0              | Bronchopneumonia, unspecified organism                                                                     |
| J18.8              | Other pneumonia, unspecified organism                                                                      |
| J18.9              | Pneumonia, unspecified organism                                                                            |
| J10.00             | Influenza due to other identified influenza virus with unspecified type of pneumonia                       |
| J10.01             | Influenza due to other identified influenza virus with the same other identified influenza virus pneumonia |
| J10.08             | Influenza due to other identified influenza virus with other specified pneumonia                           |
| J11.00             | Influenza due to unidentified influenza virus with unspecified type of pneumonia                           |
| J11.08             | Influenza due to unidentified influenza virus with specified pneumonia                                     |
| J12.9              | Viral pneumonia, unspecified                                                                               |
| J10.1              | Influenza due to other identified influenza virus with other respiratory manifestations                    |
| J11.1              | Influenza due to unidentified influenza virus with other respiratory manifestations                        |

PFIZER CONFIDENTIAL

| <b>ICD-10 code</b> | <b>ICD-10 definition</b>                                                                  |
|--------------------|-------------------------------------------------------------------------------------------|
| J10.2              | Influenza due to other identified influenza virus with gastrointestinal manifestations    |
| J10.81             | Influenza due to other identified influenza virus with encephalopathy                     |
| J10.82             | Influenza due to other identified influenza virus with myocarditis                        |
| J10.83             | Influenza due to other identified influenza virus with otitis media                       |
| J10.89             | Influenza due to other identified influenza virus with other manifestations               |
| J11.2              | Influenza due to unidentified influenza virus with gastrointestinal manifestations        |
| J11.81             | Influenza due to unidentified influenza virus with encephalopathy                         |
| J11.82             | Influenza due to unidentified influenza virus with myocarditis                            |
| J11.83             | Influenza due to unidentified influenza virus with otitis media                           |
| J11.89             | Influenza due to unidentified influenza virus with other manifestations                   |
| J09.X1             | Influenza due to identified novel influenza A virus with pneumonia                        |
| J09.X2             | Influenza due to identified novel influenza A virus with other respiratory manifestations |
| J09.X3             | Influenza due to identified novel influenza A virus with gastrointestinal manifestations  |
| J09.X9             | Influenza due to identified novel influenza A virus with other manifestations             |
| J10.08             | Influenza due to other identified influenza virus with other specified pneumonia          |
| J10.1              | Influenza due to other identified influenza virus with other respiratory manifestations   |
| J09.X9             | Influenza due to identified novel influenza A virus with other manifestations             |
| J09.X1             | Influenza due to identified novel influenza A virus with pneumonia                        |
| J09.X2             | Influenza due to identified novel influenza A virus with other respiratory manifestations |
| J09.X3             | Influenza due to identified novel influenza A virus with gastrointestinal manifestations  |
| J09.X9             | Influenza due to identified novel influenza A virus with other manifestations             |

PFIZER CONFIDENTIAL

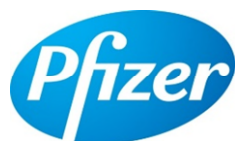

**Non-Interventional Study Protocol  
C4591014**

**Addendum to C4591014 Statistical Analysis Plan for  
Delta Variant**

**Version:** 1

**Date:** 21-Jul-2021

PFIZER CONFIDENTIAL

CT24-WI-GL03-RF03 2.0 *Non-Interventional Statistical Analysis Plan For Secondary Data Collection*

*Study* 01-Jun-2020

Page 1 of 8

**TABLE OF CONTENTS**

1. AMENDMENTS FROM PREVIOUS VERSION(S) ..... 3

2. INTRODUCTION ..... 3

    2.1. Study Design ..... 4

        2.1.1. Study population ..... 4

        2.1.2. Data source ..... 4

        2.1.3. Treatment/cohort labels ..... 5

    2.2. Study Objectives..... 6

3. STATISTICAL METHODS AND ANALYSES ..... 6



## 1. AMENDMENTS FROM PREVIOUS VERSION(S)

None

## 2. INTRODUCTION

The Israel vaccination campaign began on December 20, 2020. The country has used exclusively Pfizer-BioNTech COVID-19 vaccine BNT162b2. Since early June, the Delta variant has become the dominant strain in Israel. On June 6th, at least 70% of SARS-CoV-2 cases were Delta. After June 13th at least 90-95% were Delta. Prior to the introduction of the Delta variant in early June, estimates of BNT162b2 effectiveness against a range of SARS-CoV-2 outcomes (including all infections, symptomatic disease, hospitalization, severe disease, and death) were very high, consistent, and robust over time (VE >94%). Following the introduction of the Delta variant, however, VE estimates against all SARS-CoV-2 infections and against symptomatic infections dropped precipitously to only 57-59% in the period between June 6, 2021 and July 10, 2021. Effectiveness against hospitalizations and severe disease during this same period remained high (91-94%), although somewhat lower than the 97-99% effectiveness observed in the prior time periods. While disease rates are still relatively low in Israel, they do seem to be increasing—as do hospitalization rates in the elderly. Notably, however, the introduction of the Delta variant also corresponded with the period in which many Israelis who were vaccinated first (healthcare workers, the elderly, and those with high-risk conditions) reached approximately 6 months after receipt of the second dose. Thus, waning of immunity could also explain the observed reductions in VE in the period after June 6.

Teasing apart the impact of the introduction of the Delta variant from waning immunity of vaccination is complex and multifactorial. So far, the Delta variant has been shown to be more transmissible. However, BNT162b2 neutralizes Delta as well as the wild-type/prototype strain in the laboratory setting. Moreover, other countries including the UK and Canada have found high VE against Delta in populations that were recently (within the last 1-3 months) fully vaccinated. These findings question whether the Delta variant is the primary driver behind reduced effectiveness observed recently in Israel. Moreover, data in Israel show that the highest rates of breakthrough cases appear to be in those who were vaccinated earliest and received their second dose in January—supporting the notion that the observed reductions in VE could be driven by waning immunity. Waning at this time point is supported by data from the clinical trial showing reduced efficacy at 4-6 months following the second dose. The potential that these early data from Israel could be a signal that protection from vaccination may be starting to wane at 6 months, that the Delta variant is highly transmissible and may even infect fully vaccinated persons, or both should be monitored closely. Given these preliminary findings from a country that has served as a early beacon for how the pandemic will evolve, planning for the potential need for administering booster doses should not be overlooked.

PFIZER CONFIDENTIAL

CT24-WI-GL03-RF03 2.0 *Non-Interventional Statistical Analysis Plan For Secondary Data Collection*

*Study 01-Jun-2020*

Page 3 of 8

The purpose of this adhoc analysis plan is to evaluate and confirm or refute these findings from Israel in other populations and with varying methodology. These data are of global health importance and inform the need for if and what type of COVID-19 vaccine booster is needed. Therefore, we chose to evaluate this question by using data from Kaiser Permanente Southern California (KPSC), a large integrated healthcare organization with over 4.7 million members who are socioeconomically diverse and have a broad representative population that reflects racial/ethnic groups living in Southern California.

KPSC is a population where VE against the Delta variant is currently being evaluated. In particular, we will, with this emergency ad hoc analysis as requested by the CDC and the Israel MoH, assess preliminary estimates of vaccine effectiveness in KPSC comparing overall estimates of effectiveness to estimates of effectiveness against the Delta variant and against non-Delta variants. We will additionally stratify these estimates by age group and by time since being fully vaccinated. This will allow us to determine whether VE appears lower against the Delta variant, whether VE appears to be waning, or both. We will also determine if these effects appear consistent across all age groups.

This analytical plan focusses specifically on the data analysis of the Delta variant in KPSC population. Note that, for most part where appropriate, the methodology outlined within the SAP for Protocol C4591014 will be adopted with a special emphasis on the Delta variant which is of primary import in this analysis.

## **2.1. Study Design**

This is a database analysis study of existing healthcare data from KPSC, and no patients will be actively enrolled. In brief, the Cohort Study as described in Section 2.1.2 of the C4591014 SAP will be utilized for the identification of the qualifying subjects for this analysis. For full study design and other details, please refer to C4591014 protocol.

### **2.1.1. Study population**

The population will include all KPSC patients 12 years or older who are in the KPSC database as of December 14, 2020 and have at least one year of prior membership within KPSC in order to determine comorbidities and medical history. Patients are followed through the electronic health record for outcomes of interest. Refer to Section 2.1.2 of the C4591014 SAP for full details.

### **2.1.2. Data source**

All data will be collected from KPSC electronic health records (EHR). This is a database analysis study of existing healthcare data, and no patients will be actively enrolled. Data on vaccination status, dates of vaccination, COVID-19 testing and outcomes,

comorbidities, prior healthcare utilization, other vaccinations, demographic data, and other data from the EHR will be collected for this analysis.

### 2.1.3. Treatment/cohort labels

For the purpose of this analyses, the following definitions will be utilized:

#### Exposure Definition:

The exposure of interest is history of vaccination with BNT162b2. For the primary objective, patients will be considered fully vaccinated starting 7 days after receiving the second dose of BNT162b2. Three levels of exposure variable will be assessed as described below:

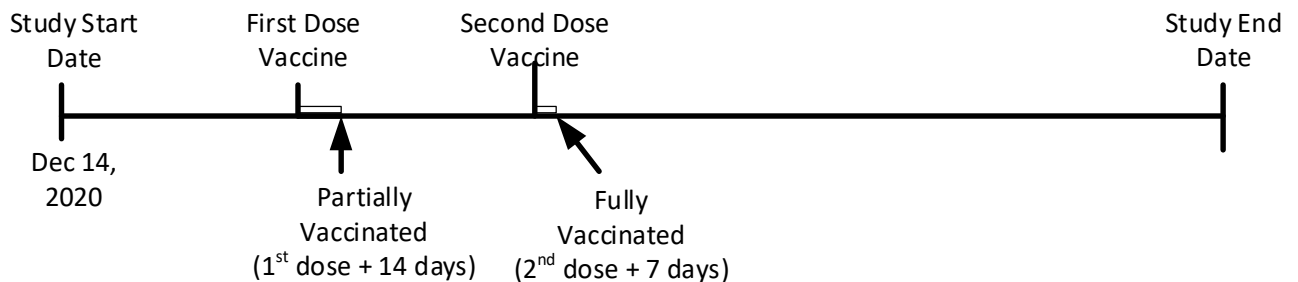

#### Fully vaccinated:

Patients will be considered fully vaccinated starting 7 days after receiving their second dose of BNT162b2. This group will serve as the ‘exposed’ group evaluated in the primary objective.

#### Partially vaccinated:

Patients will be considered partially vaccinated starting 14 days after receiving a first dose of BNT162b2.

#### Unvaccinated:

Patients who did not receive any vaccine for SARS-CoV-2 will serve as the reference group (i.e., ‘unexposed’ group) in all VE analyses. Patients who received any other COVID-19 vaccine will be excluded, in this group.

#### Delta and Non-Delta variants:

PFIZER CONFIDENTIAL

CT24-WI-GL03-RF03 2.0 *Non-Interventional Statistical Analysis Plan For Secondary Data Collection*

Study 01-Jun-2020

Page 5 of 8

PCR positive patient sequenced by whole genome sequence (WGS) and confirmed to be Delta variants of SARS-CoV-2 will be considered as the Delta Variants. Patients who are PCR positive, sequenced by WGS but confirmed to have a non-Delta variant will be considered non-Delta variant.

## 2.2. Study Objectives

### Primary:

The primary objective of the study is to estimate vaccine effectiveness (VE) of 2 doses of BNT162b2 (i.e., fully vaccinated) against SARS-CoV-2 infections by the Delta variant and against hospitalization due to SARS-CoV-2 infections by the Delta variant among KPSC members  $\geq 12$  years of age as of December 14, 2020. VE will be calculated as  $1 - RR$  (Risk Ratio), where RR will be evaluated using a cohort design. At a minimum, the following will be assessed:

- overall KPSC estimates of VE against SARS-CoV-2 infections to VE against SARS-CoV-2 infections that have been WGS and are caused by the Delta variant and VE against SARS-CoV-2 infections that have been WGS and are caused by a non-Delta variant
- overall KPSC estimates of VE against hospitalizations caused by SARS-CoV-2 infections to VE against hospitalizations caused by SARS-CoV-2 infections that have been WGS and are caused by the Delta variant and VE against hospitalizations caused by SARS-CoV-2 infections that have been WGS and are caused by a non-Delta variant
- Stratify the VE estimates by age group and by time since being fully vaccinated

### Secondary:

One secondary objective is to examine the above VE estimates for Partially vaccinated patients. Additional secondary objectives are to examine VE estimates against SARS-CoV-2 infections and against hospitalizations (i.e., with or without WGS testing). An additional secondary objective is to examine VE estimates against ED admission caused by SARS-CoV-2 infections. Additional secondary objectives will be evaluated, including among other subgroups of interest, as the data evolves.

## 3. STATISTICAL METHODS AND ANALYSES

### Proposed Table 1:

Descriptive analyses will report the proportion of patients with SARS-CoV-2 infections and proportion of patients with SARS-CoV-2 infections for whom WGS is conducted and

PFIZER CONFIDENTIAL

CT24-WI-GL03-RF03 2.0 *Non-Interventional Statistical Analysis Plan For Secondary Data Collection*

Study 01-Jun-2020

Page 6 of 8

are confirmed Delta variant. Summaries will be presented as N and % for each of the patient groups of Unvaccinated, Partially vaccinated, Fully vaccinated, Fully vaccinated < 3 months from the second dose, and Fully vaccinated  $\geq$  3 months after the second dose. See Table 1 in Appendix 1 for the proposed mock shell.

Proposed Table 2:

Descriptive analyses will report the proportion of patients with SARS-CoV-2 infections and proportion of patients with SARS-CoV-2 infections for whom WGS is conducted and confirmed Delta variant. Summaries will be presented as N and % for each of the patient groups within No documented SARS-CoV-2 infection, SARS-CoV-2 infection, and COVID-19 related hospitalizations, respectively. See Table 2 in Appendix 1 for the proposed mock shell.

Vaccine Effectiveness (VE) Tables on All SARS-CoV-2 cases (with or without WGS), WGS confirmed Delta cases, and Non-Delta cases:

In these tables, unadjusted and adjusted VE estimates along with the 95% CI's will be presented. In brief, the relative risk of developing SARS-CoV-2, confirmed Delta variant, among the fully vaccinated, partially vaccinated, and unvaccinated patients in this cohort study will be constructed and compared using RRs and 95% CIs. This is the unadjusted VE and will be calculated as  $1 - \text{RR}$  multiplied by 100%. Corresponding 95% CIs will be calculated using the Wald method. In particular, the following will be analyzed:

In addition to constructing crude RR and unadjusted VE estimates, Cox proportional hazards regression modelling to assess BNT162b2 VE after adjustment for potential confounding factors will be performed. Details of this method is described in Section 6.1.1 under *Estimating Adjusted VE* within the C4591014 SAP. When reporting results from the final fully adjusted model, univariate VE results will also be presented for each independent variable that is assessed for potential confounding.

See Tables 3 – 5 in Appendix 1 for the proposed mock shells on All SARS-CoV-2 patients (Table 3), WGS Confirmed Delta Variant patients (Table 4), and Non-Delta patients (Table 5), respectively. For these tables, the data will be summarized in the following five groups:

- Unvaccinated
- Partially vaccinated
- Fully vaccinated
- Fully vaccinated < 3 months from the second dose
- Full vaccinated  $\geq$  3 months after the second dose

Note that the age groups are slightly different in Table 3 i.e. VE in All SARS-CoV-2 patients (12 – 15 years, 16 – 44 years, 45 – 64 years,  $\geq$  65 years, and All ages  $\geq$  12 years)

than in Table 4 for WGS Confirmed Delta Variant patients or Table 5 for Non-Delta patients as the numbers are anticipated to be extremely low in comparison to All SARS-CoV-2 patients. Regardless of these age groups, in these tables both SARS-CoV-2 infection and COVID-19 related hospitalizations will be summarized separately.

**NOTE:**

Additional analyses conducted (if any) will be documented in the final SAP for the study but amendments to this addendum will not be made. Currently, these analyses are assumed to be sufficient for a conclusive and meaningful interpretation of the observed results using this preliminary adhoc analysis plan but may need to be modified subsequently as additional data is available or during the process of manuscript preparation.
